# Supplementary material
Source: PubMed Central journal article supplement (PMC3806883)

|                    |           |                 |                                  |
|--------------------|-----------|-----------------|----------------------------------|
| <b>Scan number</b> | 3734      | <b>Raw file</b> | ges_Mtb_CFP_200ng_HCD_29nov12_01 |
| <b>Method</b>      | FTMS; HCD | <b>Pepti...</b> | 59.86                            |

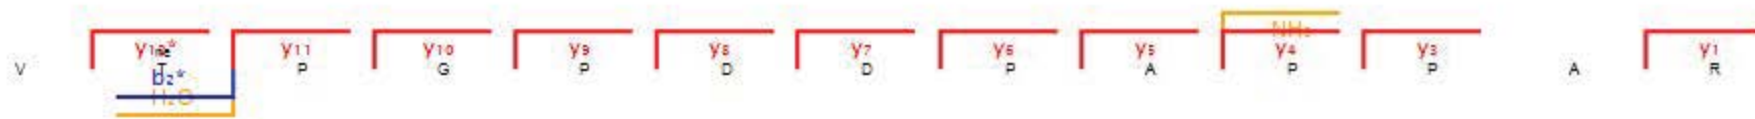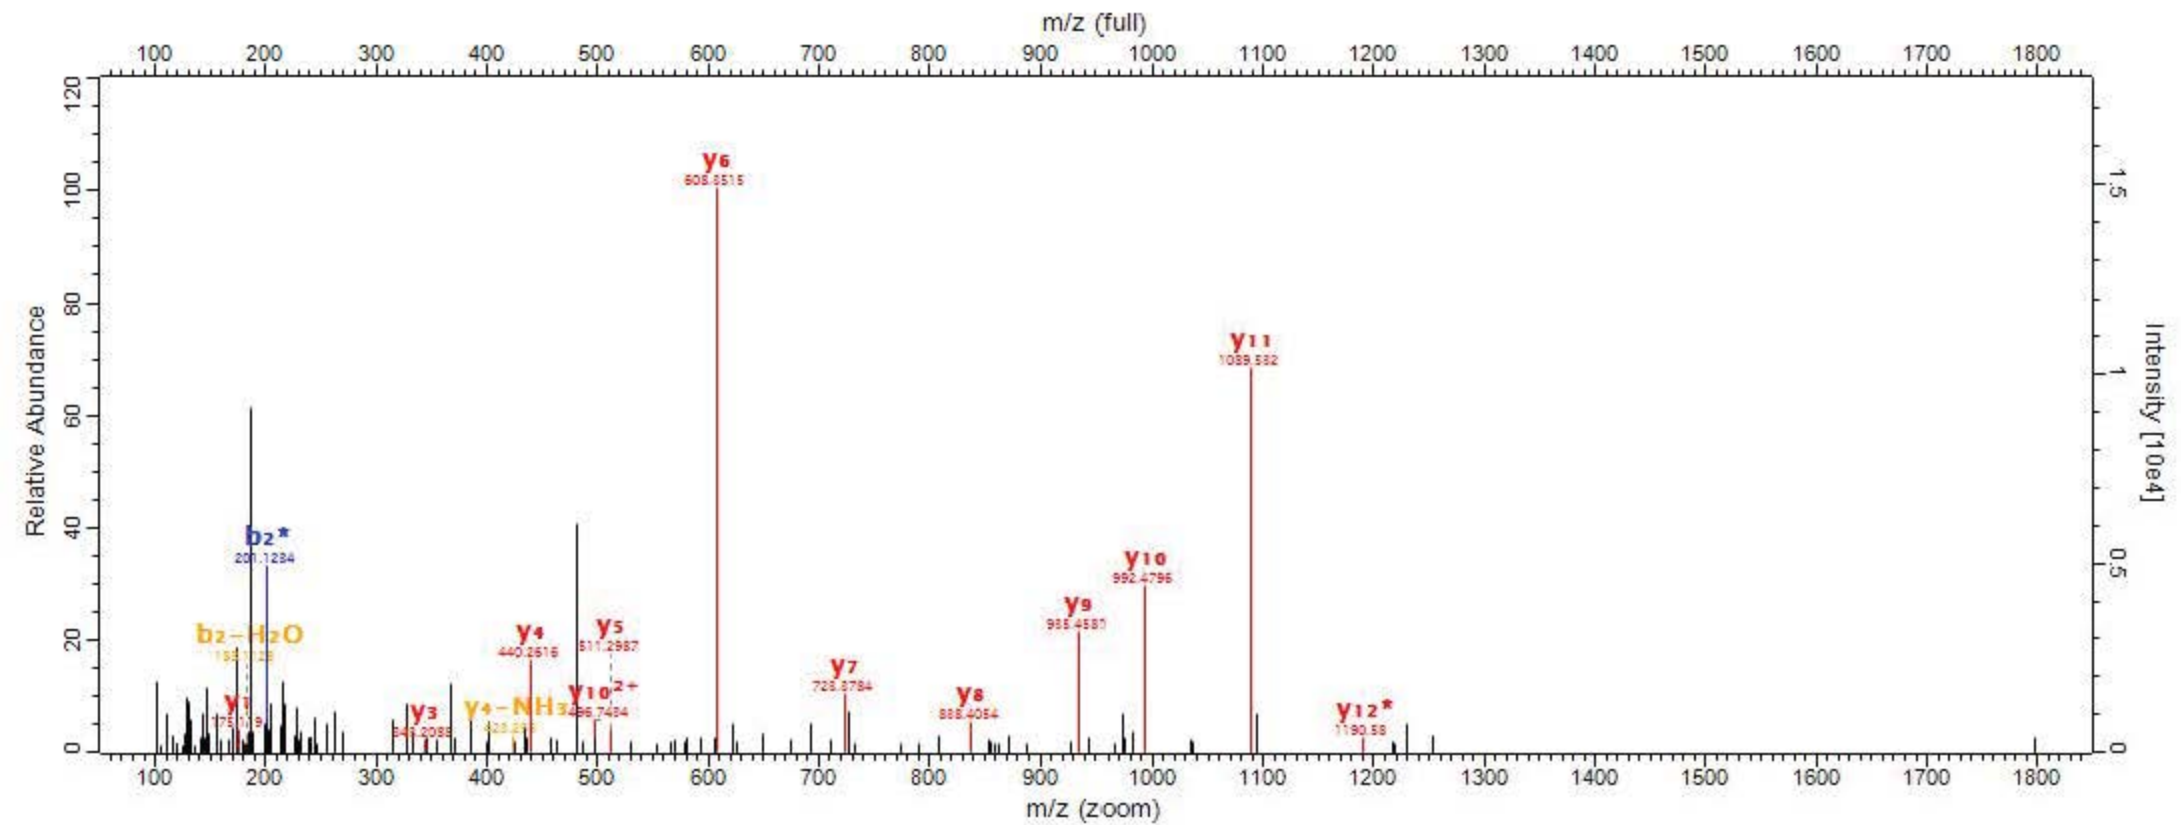

Scan number 19624 Raw file ges\_Mtb\_CFP\_200ng\_HCD\_29nov12\_01  
 Method FTMS; HCD Peptide 200.1

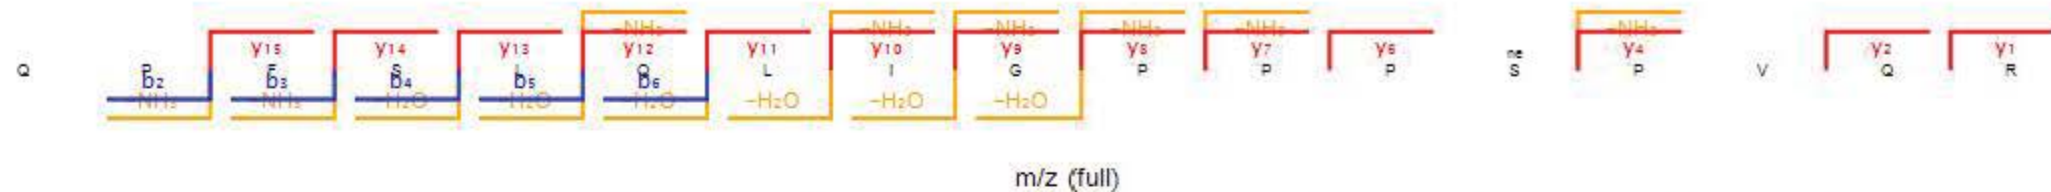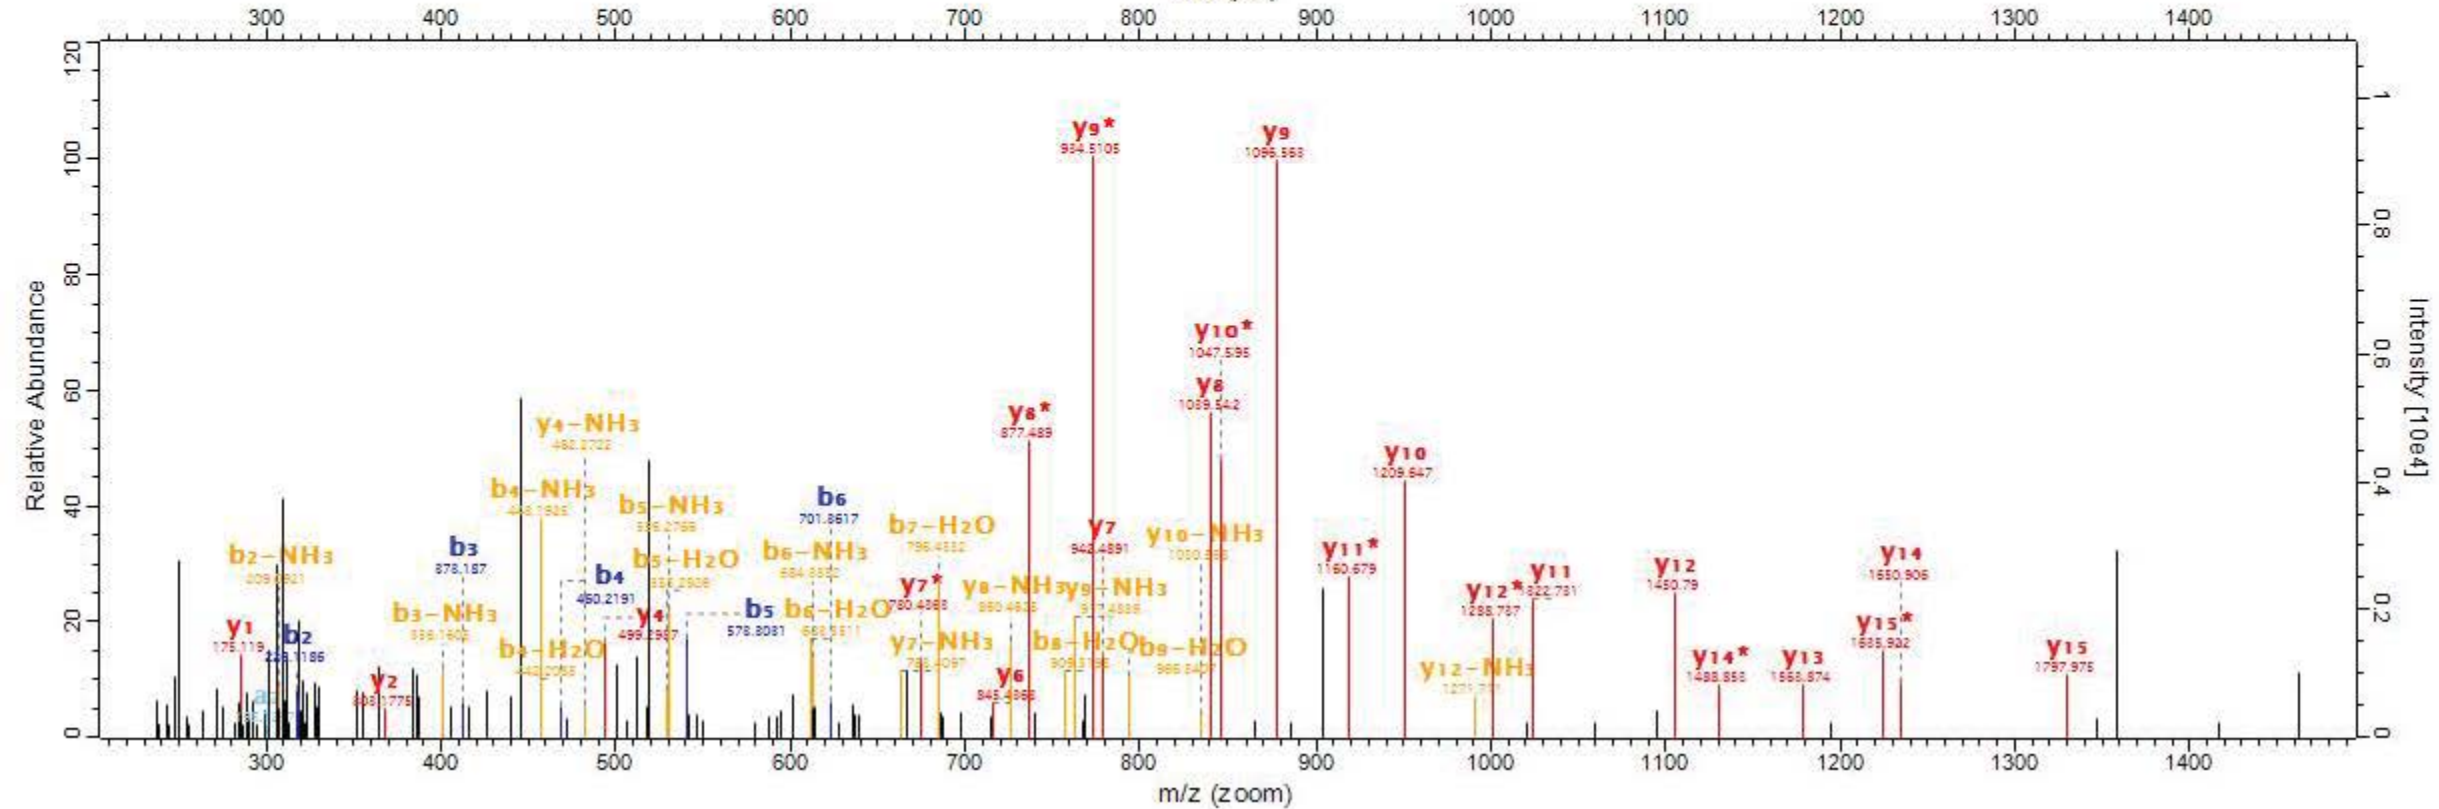

Scan number 12362 Raw file ges\_Mtb\_CFP\_20apr10\_01  
 Method ITMS: CID Pepti... 184.47

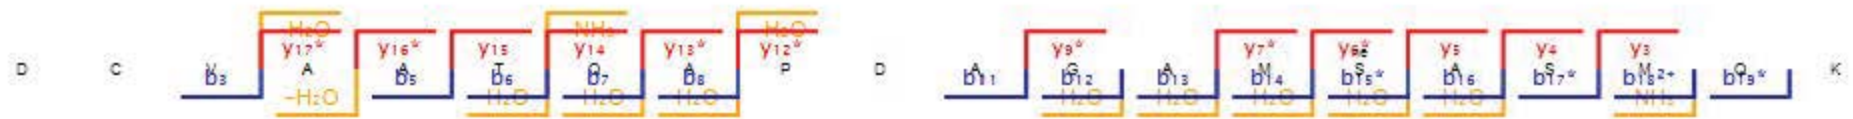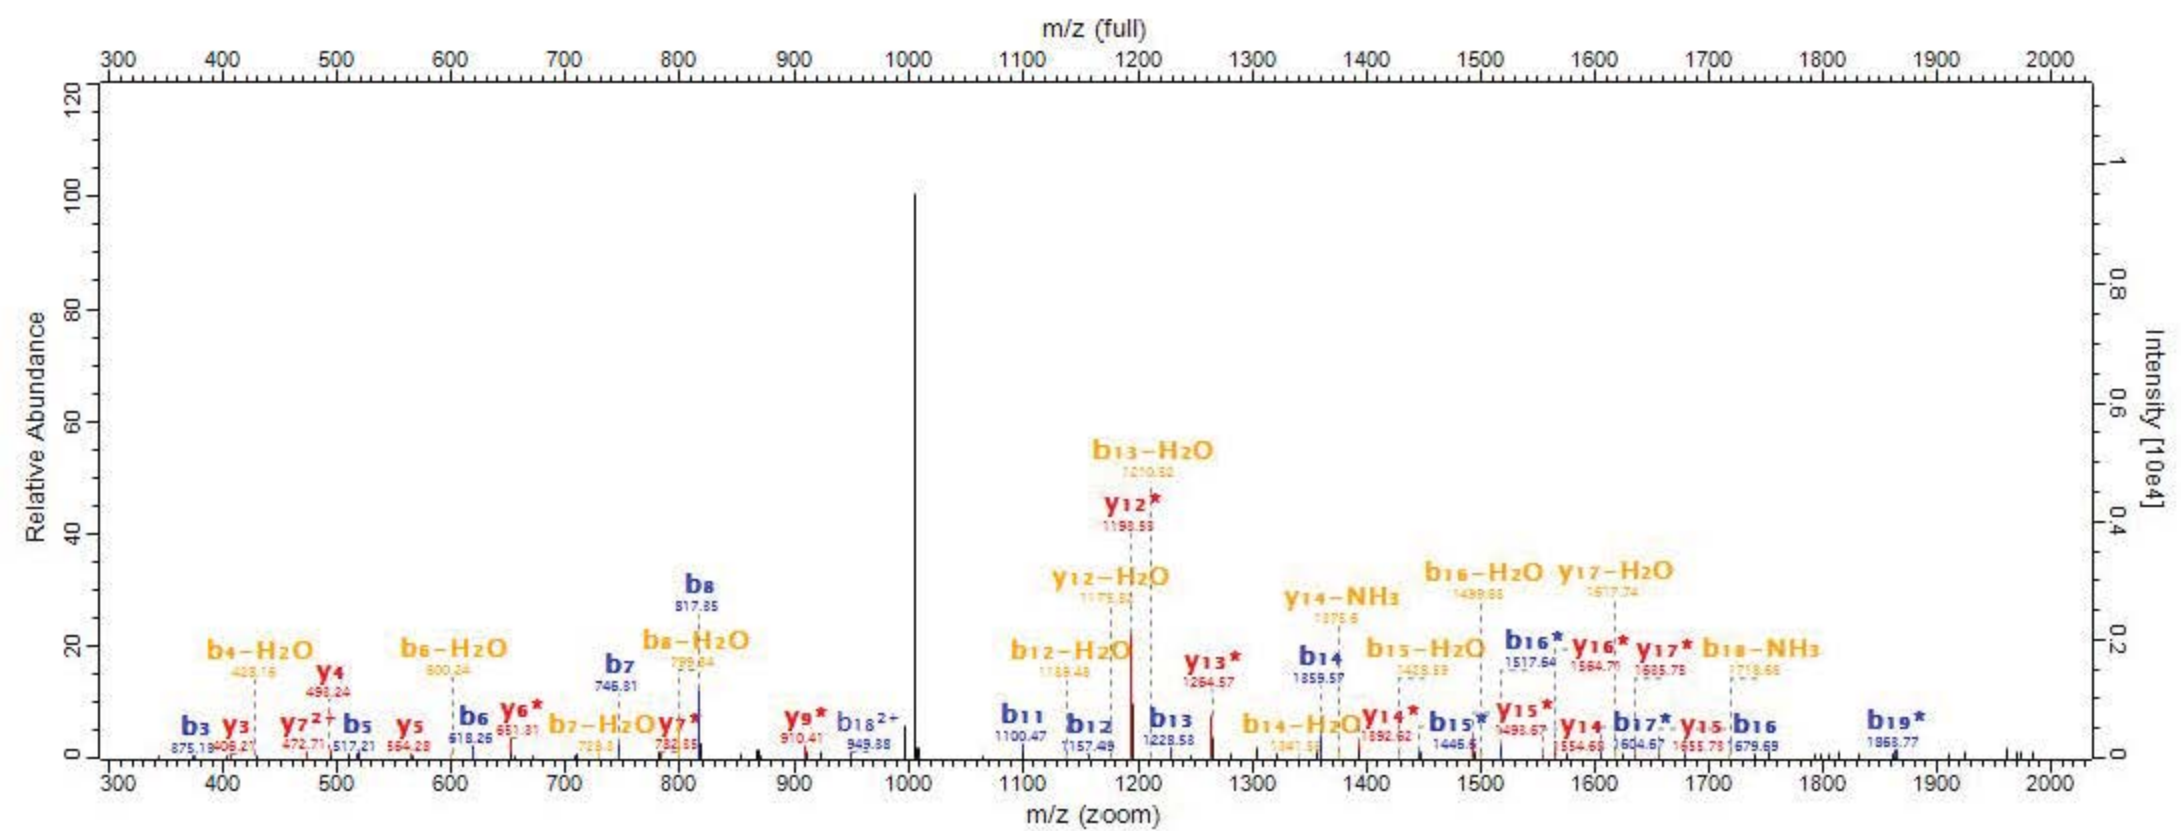

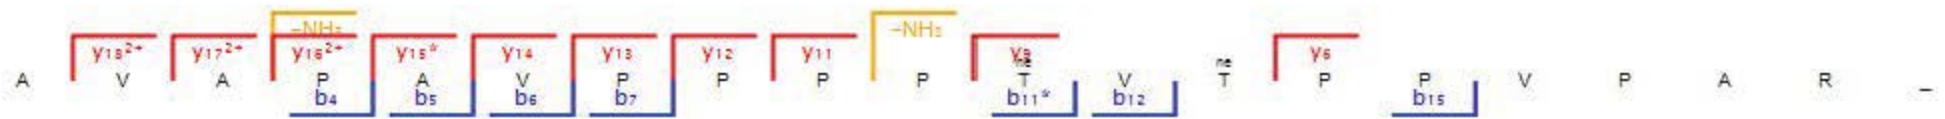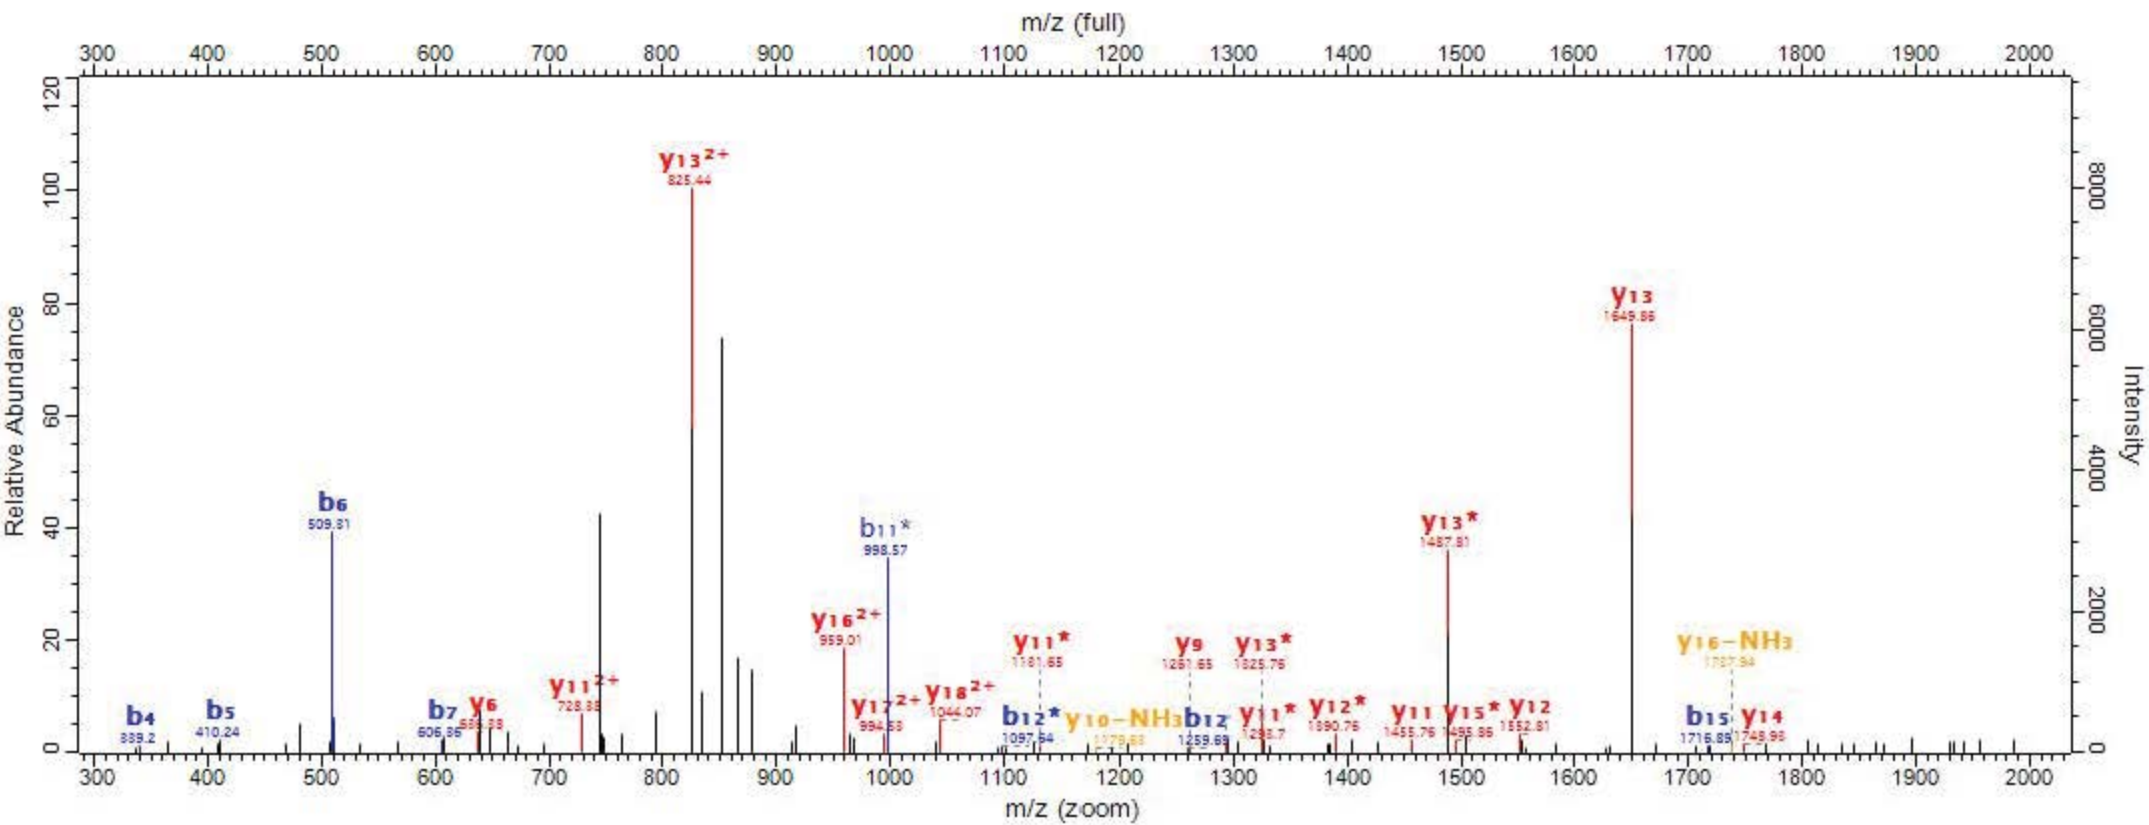

Scan number 9079 Raw file ges\_Mtb\_CFP\_ConA\_ETD\_02nov12\_01  
 Method ITMS; ETD Pepti... 109.79

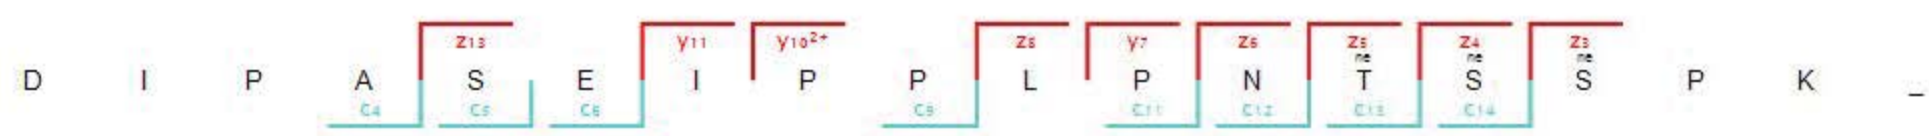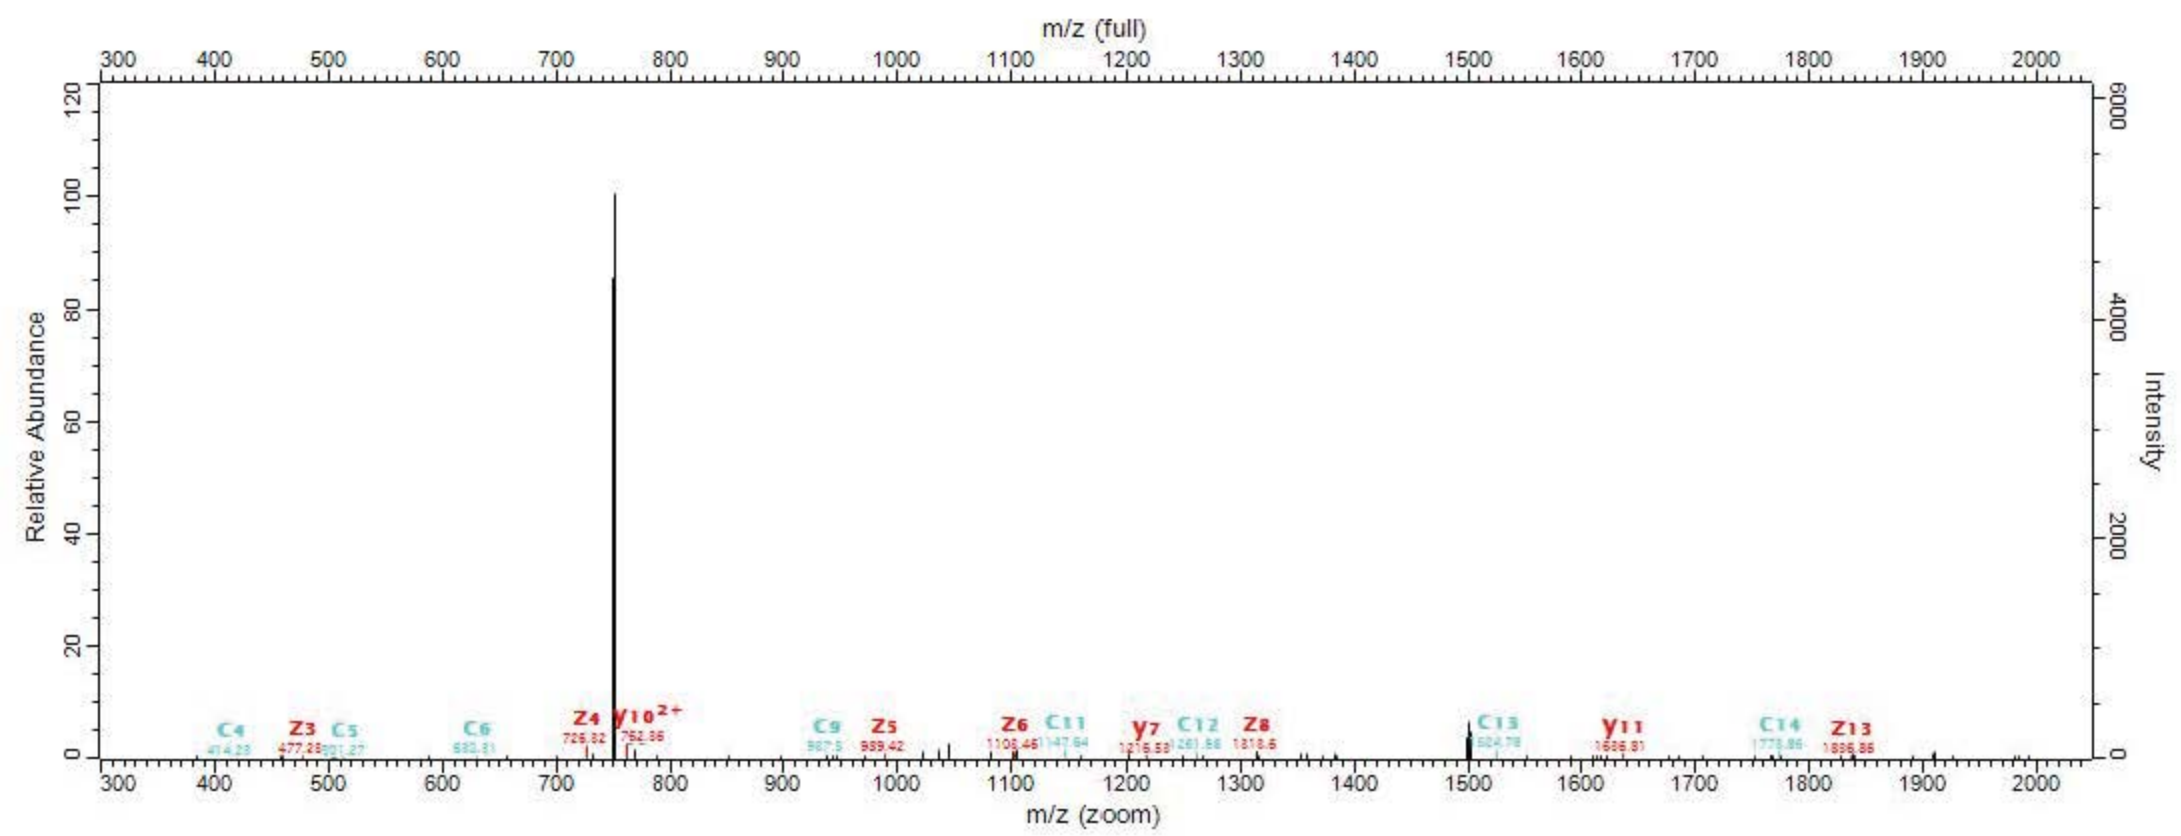



Scan number 6536 Raw file ges\_Mtb\_CFP\_ConA\_ETD\_02nov12\_01  
Method ITMS; ETD Pepti... 145.71

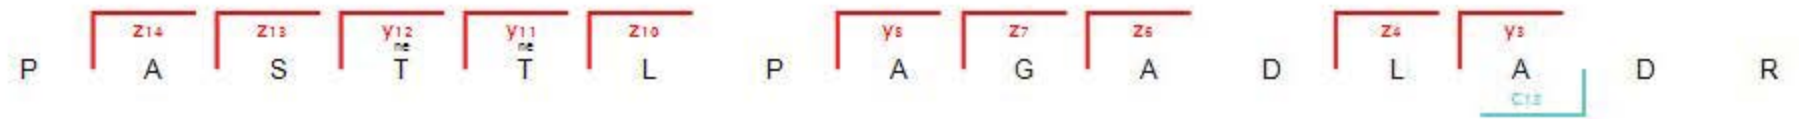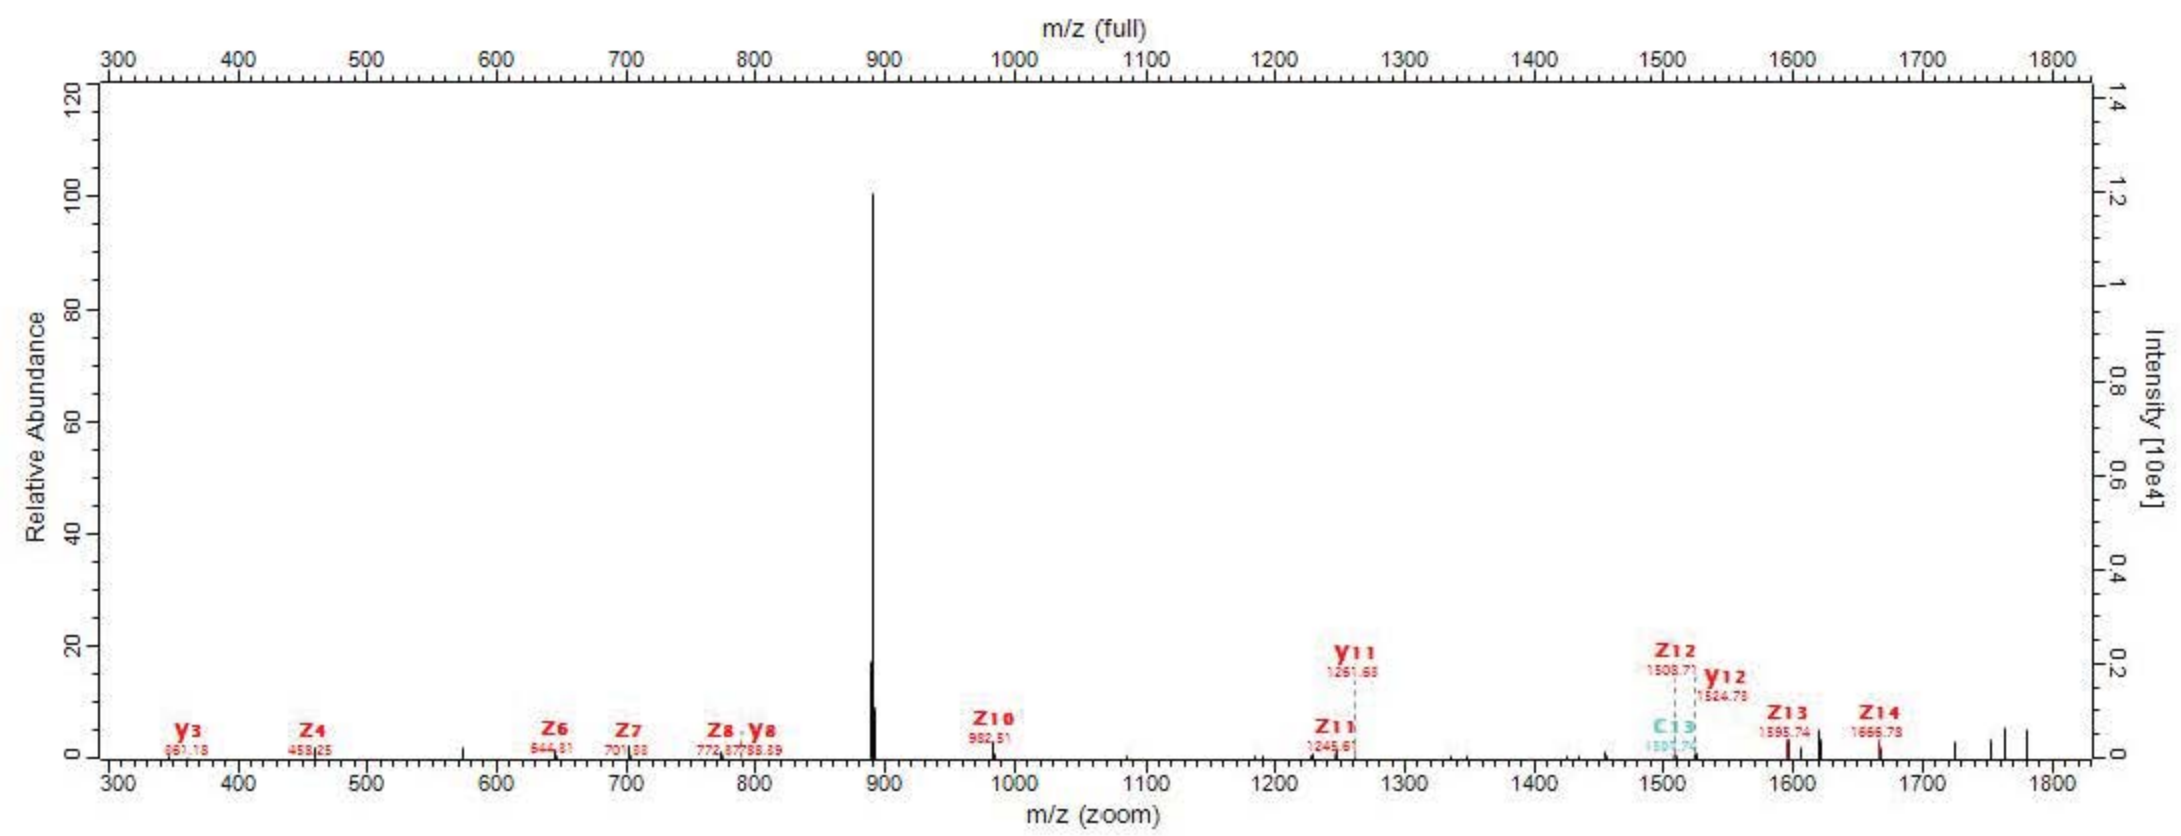

Scan number 4113 Raw file ges\_Mtb\_CFP\_ConA\_ETD\_02nov12\_01  
Method ITMS; ETD Pepti... 129.71

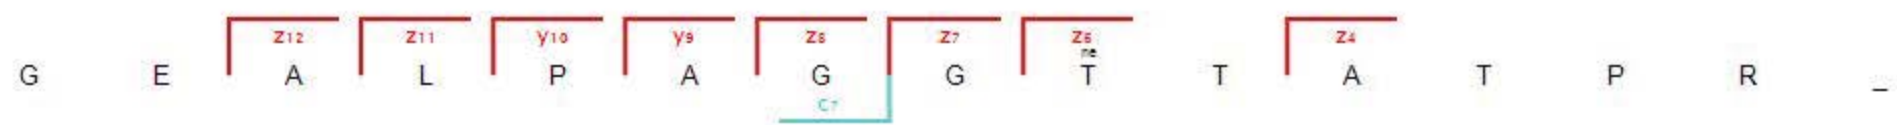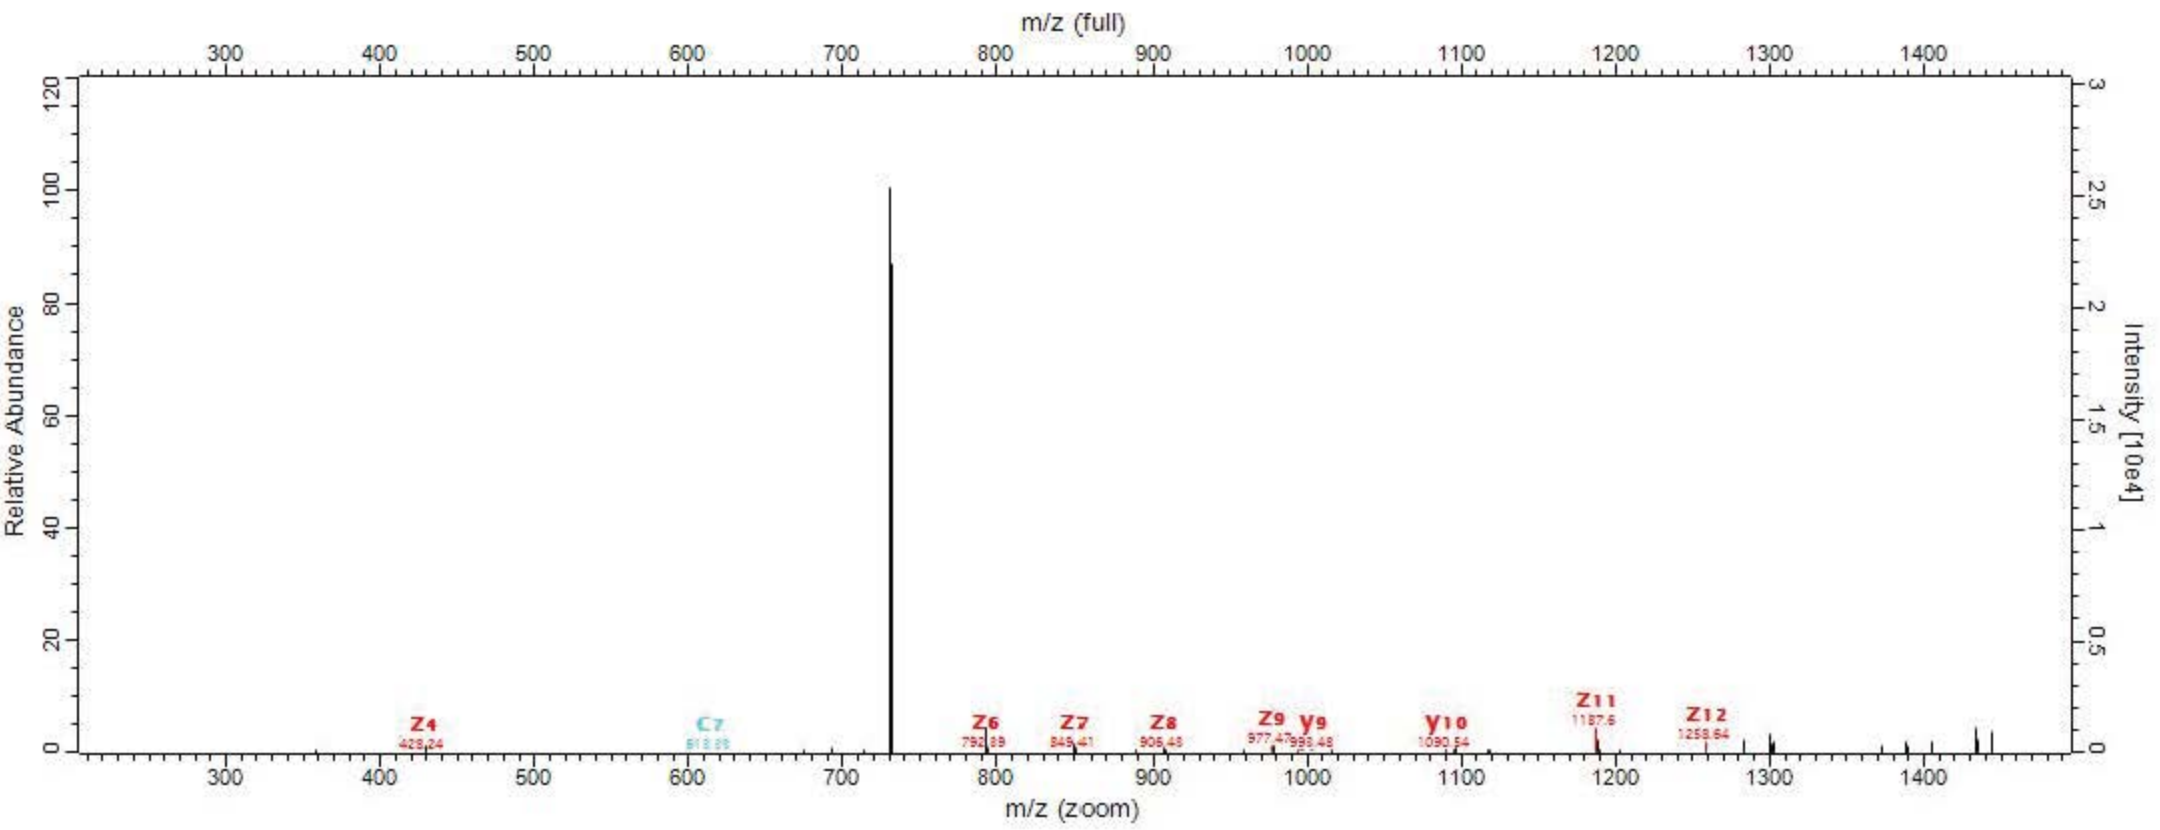

Scan number 8138 Raw file ges\_Mtb\_CFP\_200ng\_HCD\_28nov12\_01  
 Method FTMS; HCD Peptide 178.72

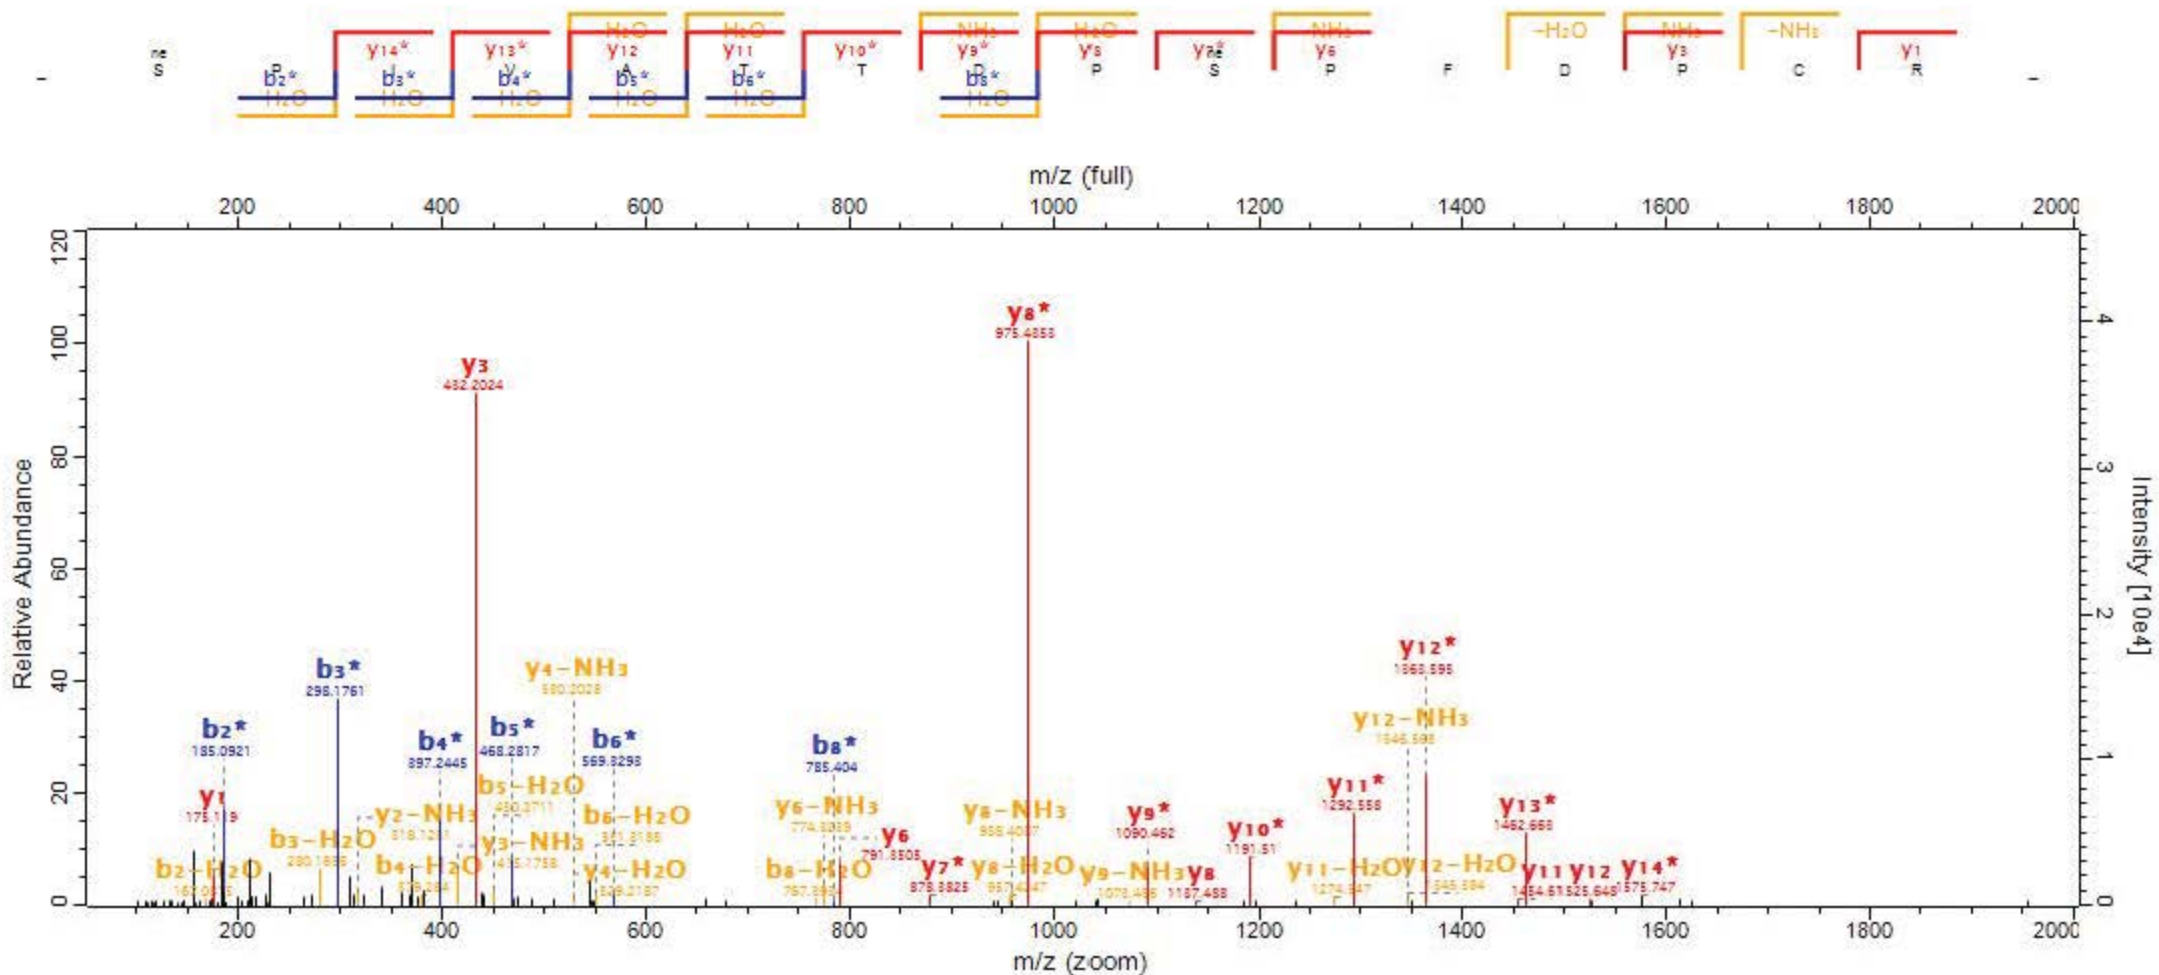



Scan number 13264 Raw file ges\_Mtb\_CFP\_H37Rv\_Halo\_60C\_13jun11\_07  
 Method ITMS: CID Pepti... 177.4

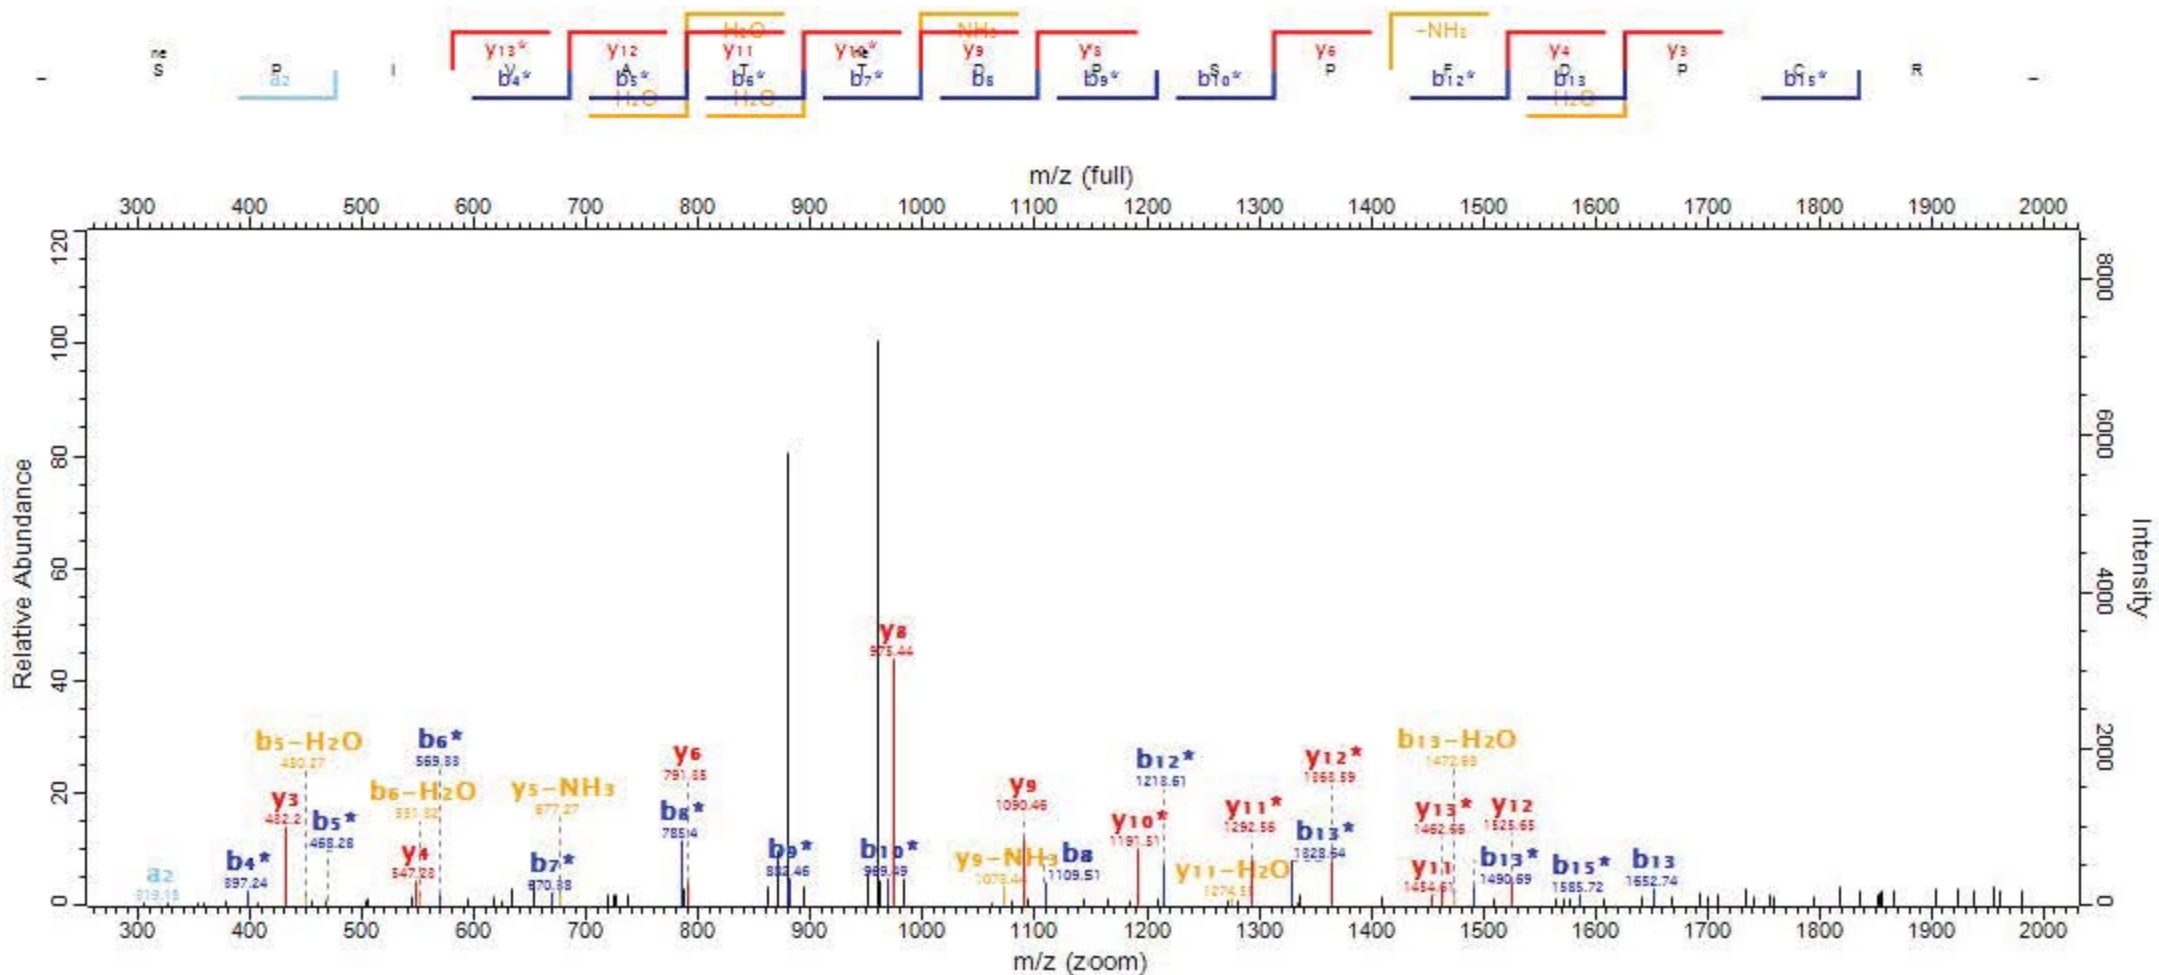

Scan number 17036 Raw file ges\_Mtb\_CFP\_H37Rv\_23may11\_02  
Method ITMS: CID Peptide 168.27

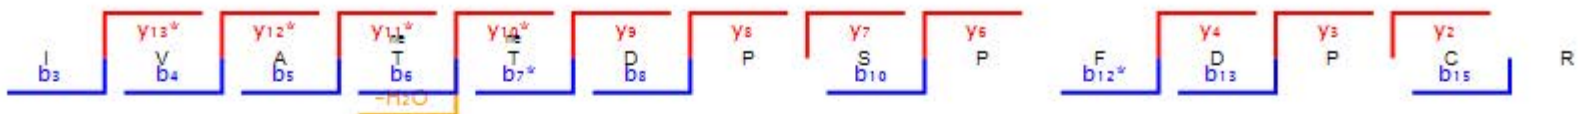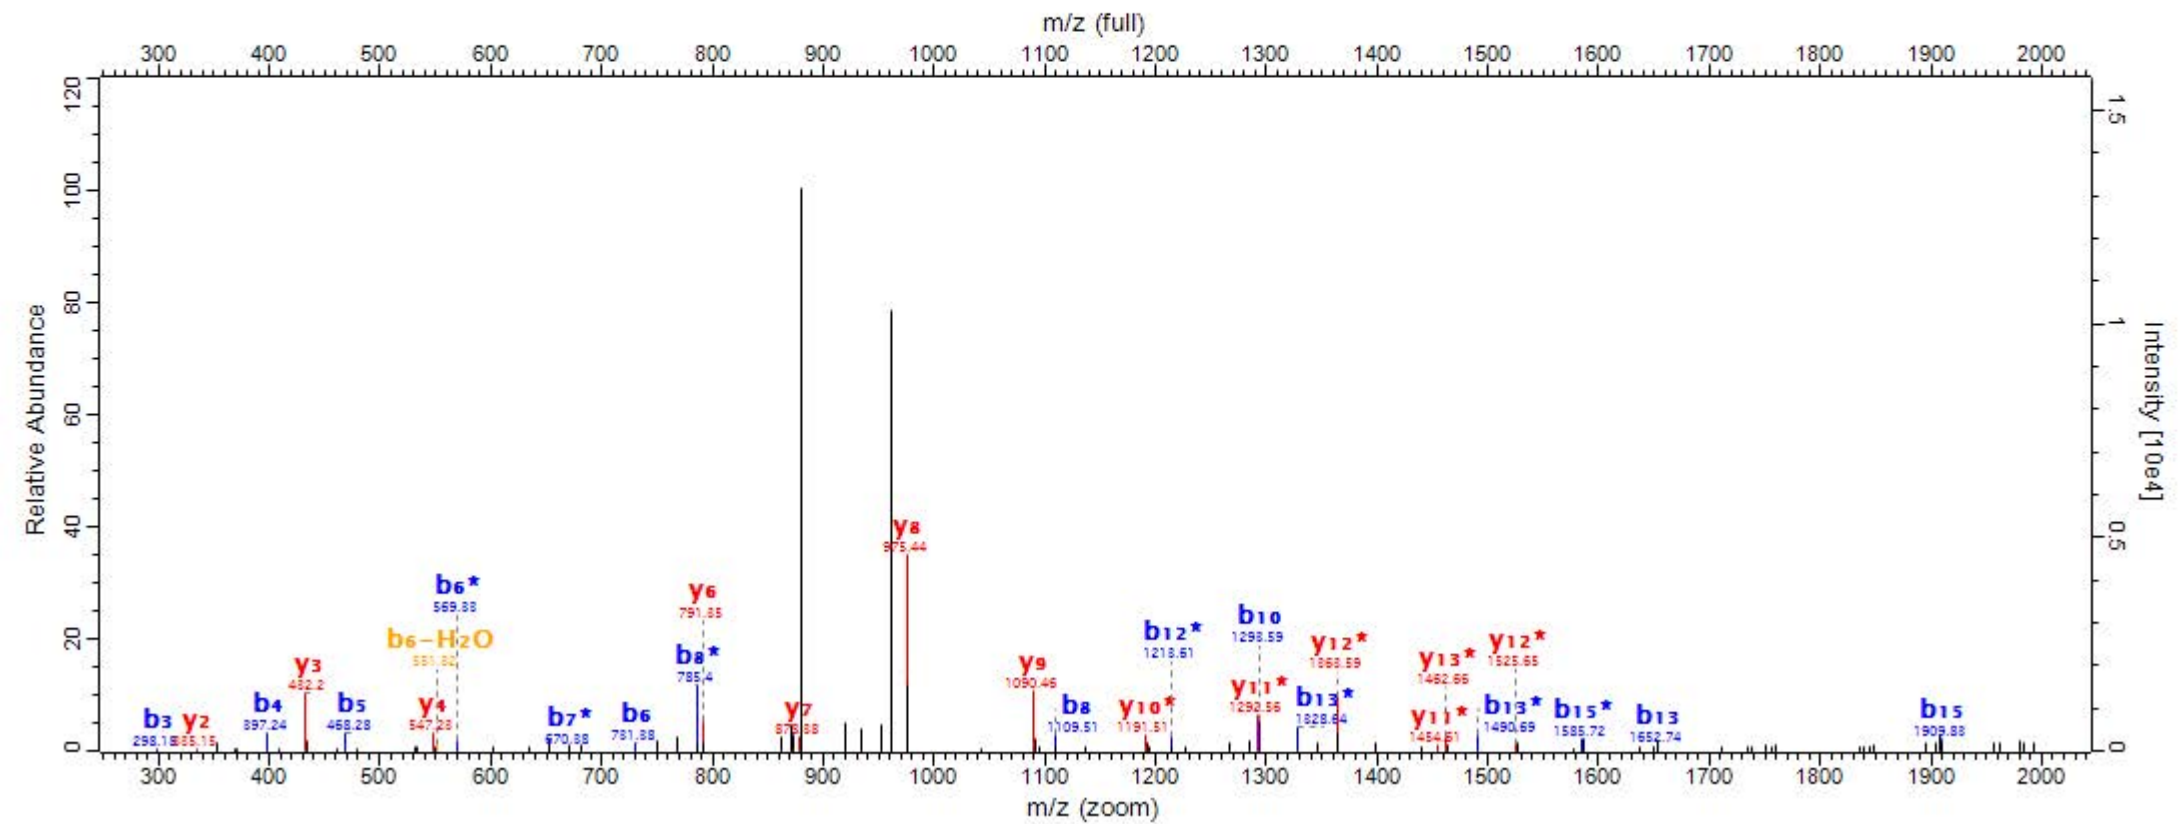

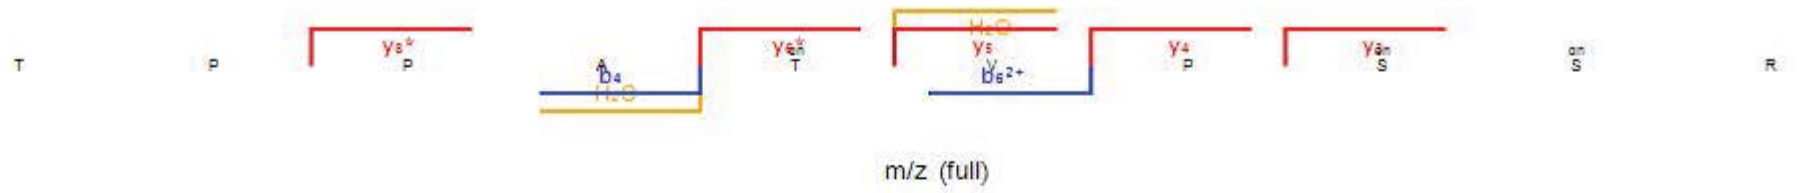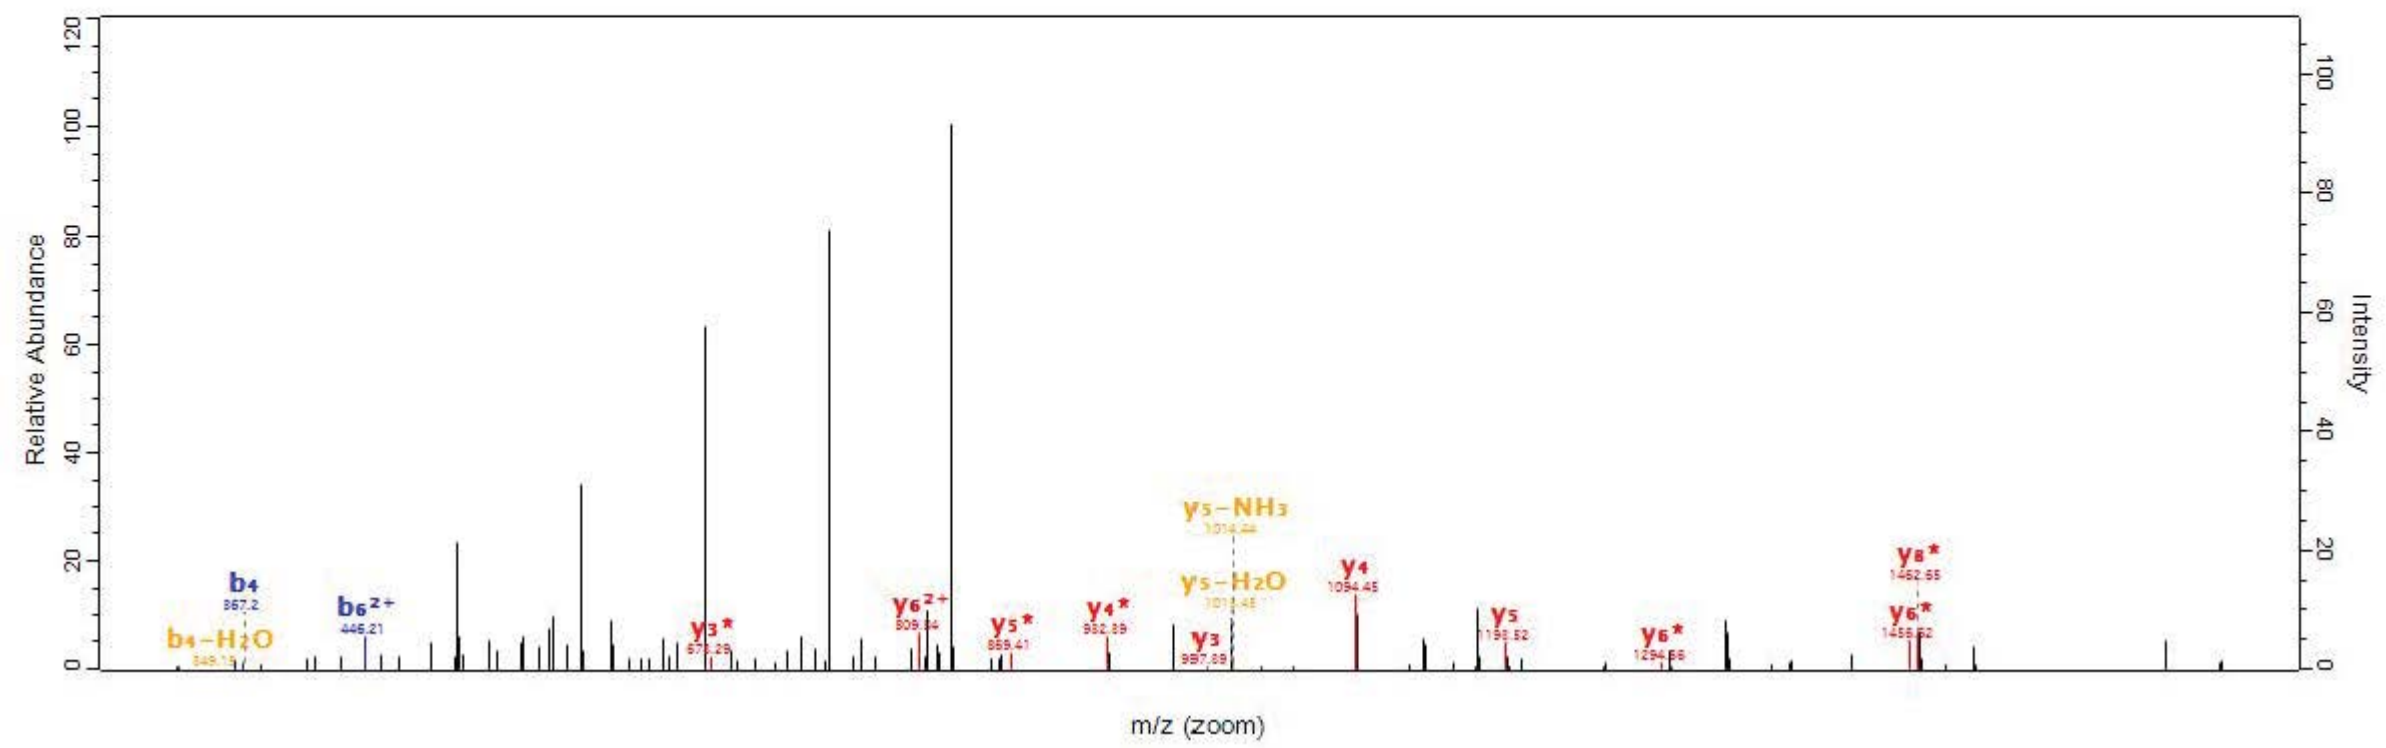

Scan number 23850 Raw file ges\_Mtb\_CFP\_20apr10\_01  
 Method ITMS: CID Pepti... 142.39

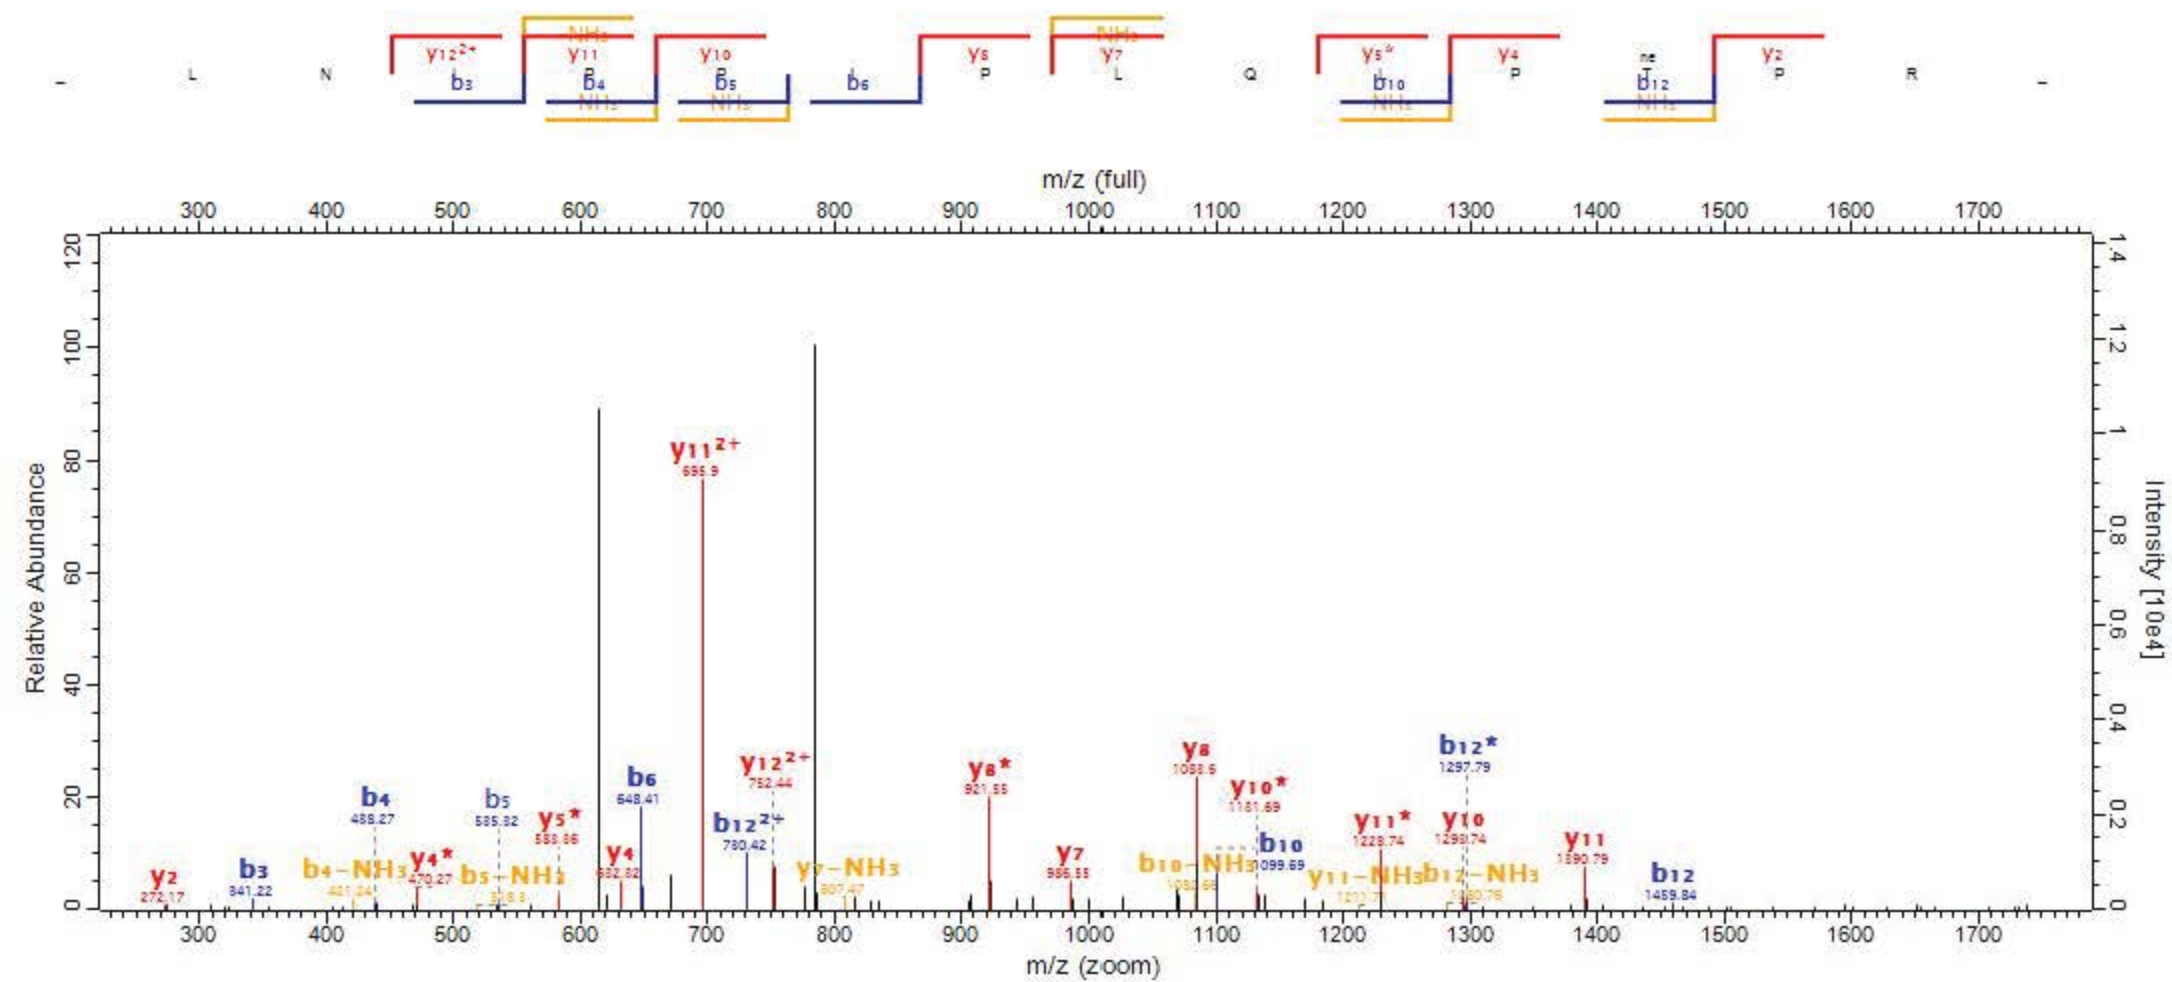





Scan number 13529 Raw file ges\_Mtb\_CFP\_20Apr10\_01  
 Method ITMS: CID Pepti... 187.73

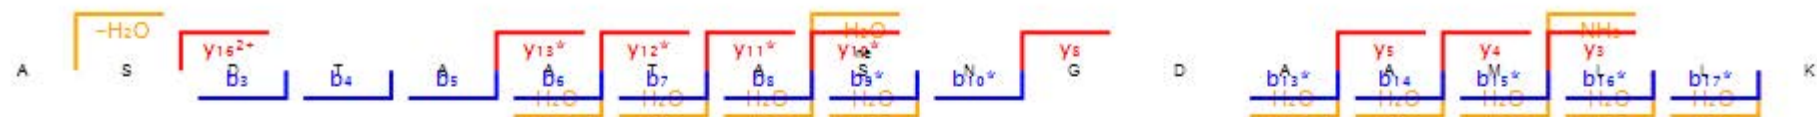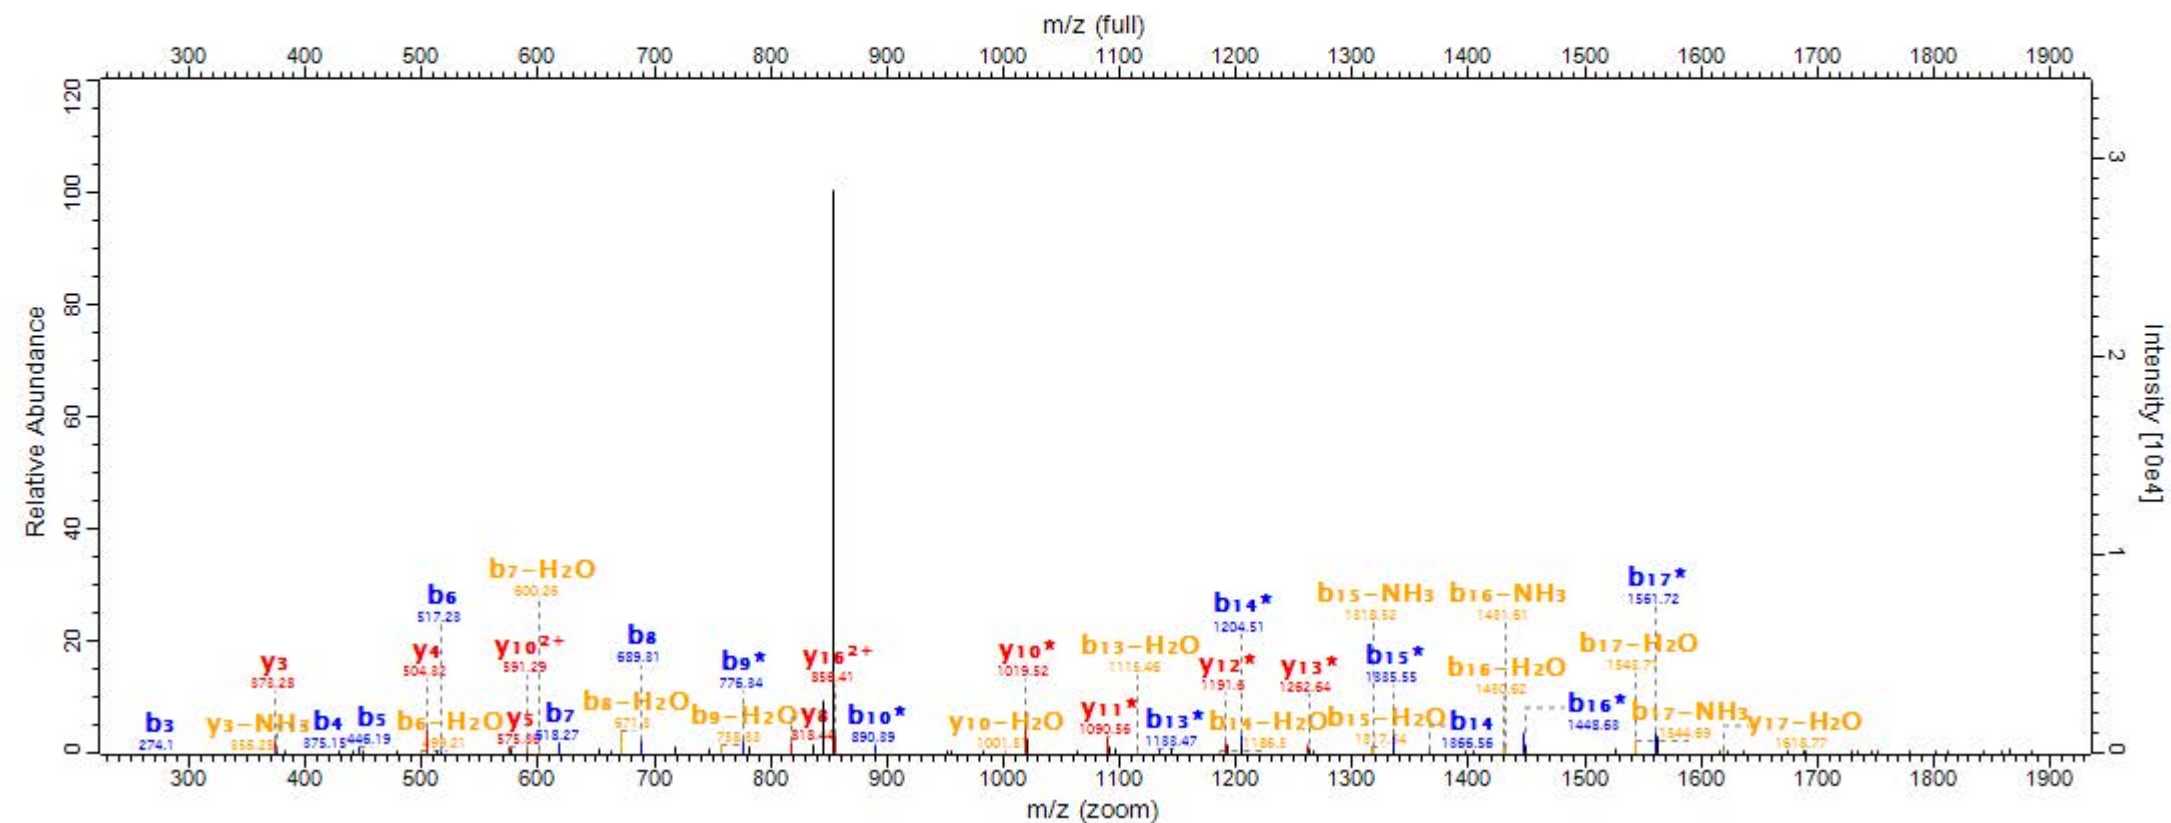



Scan number 7245 Raw file ges\_Mtb\_CFP\_ConA\_ETD\_02nov12\_01  
Method ITMS; ETD Pepti... 232.17

A S D T A A T A S N G D A A M L L K

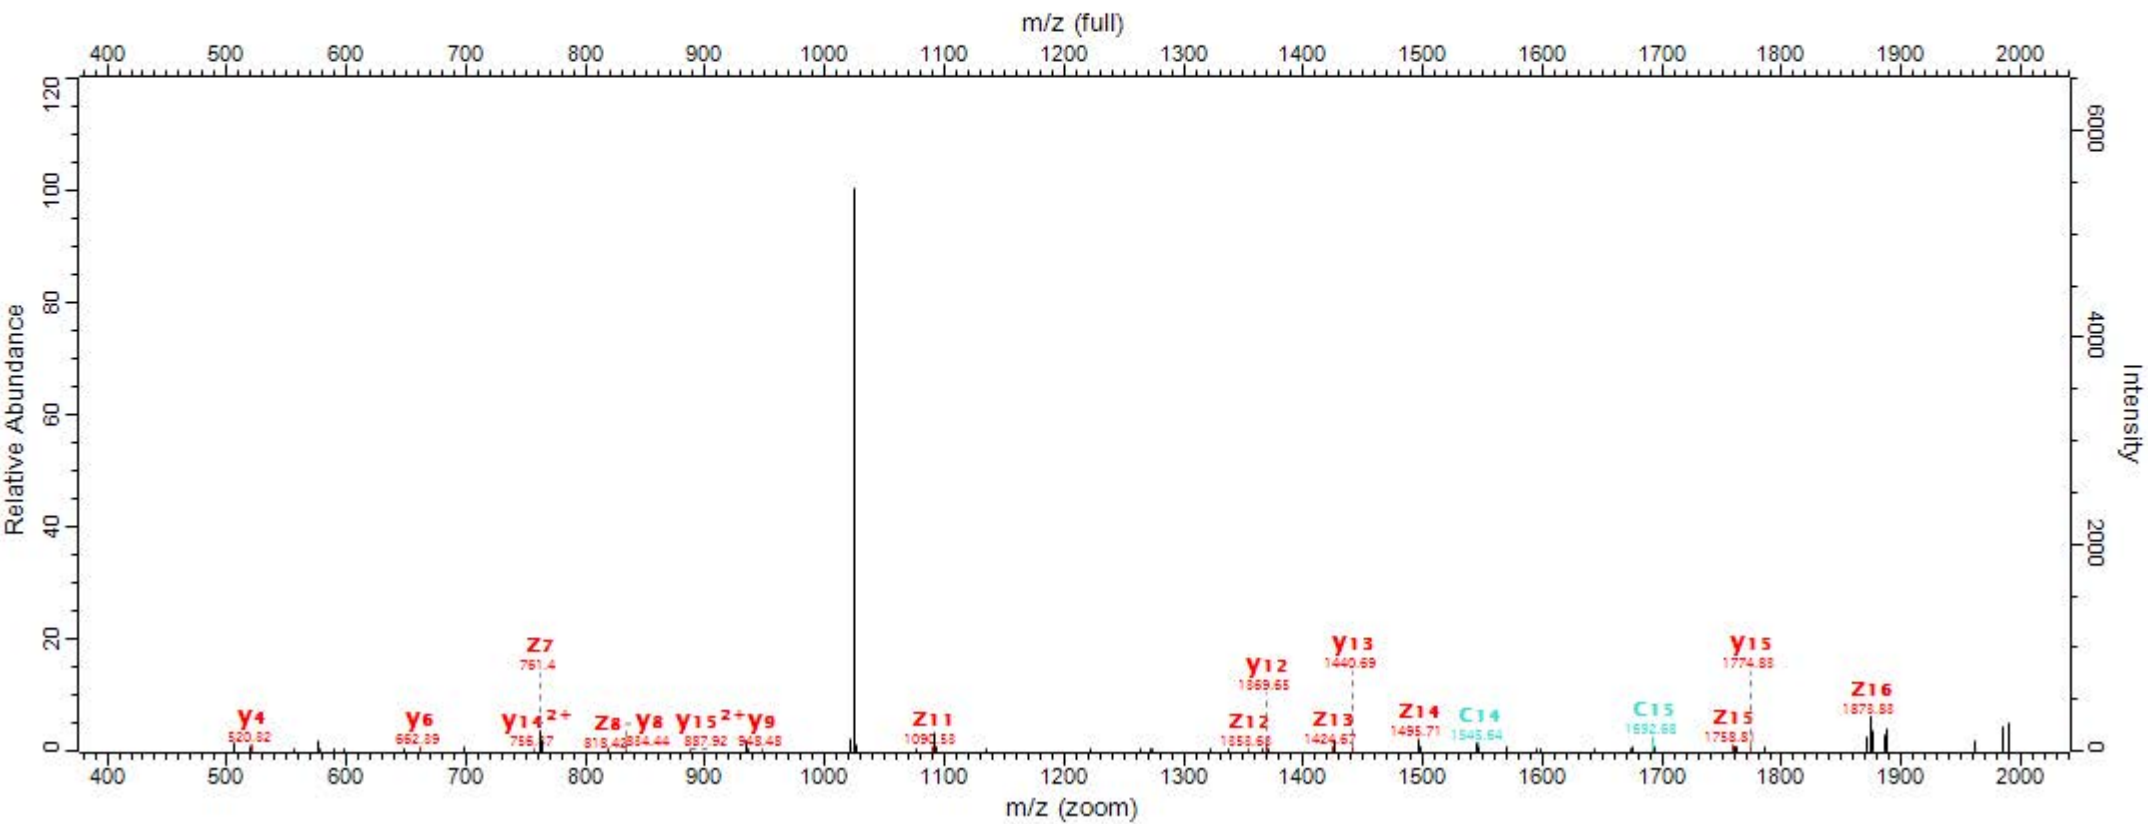

Scan number 676 Raw file ges\_Mtb\_CFP\_200ng\_HCD\_28nov12\_01  
 Method FTMS; HCD Peptide 119.56

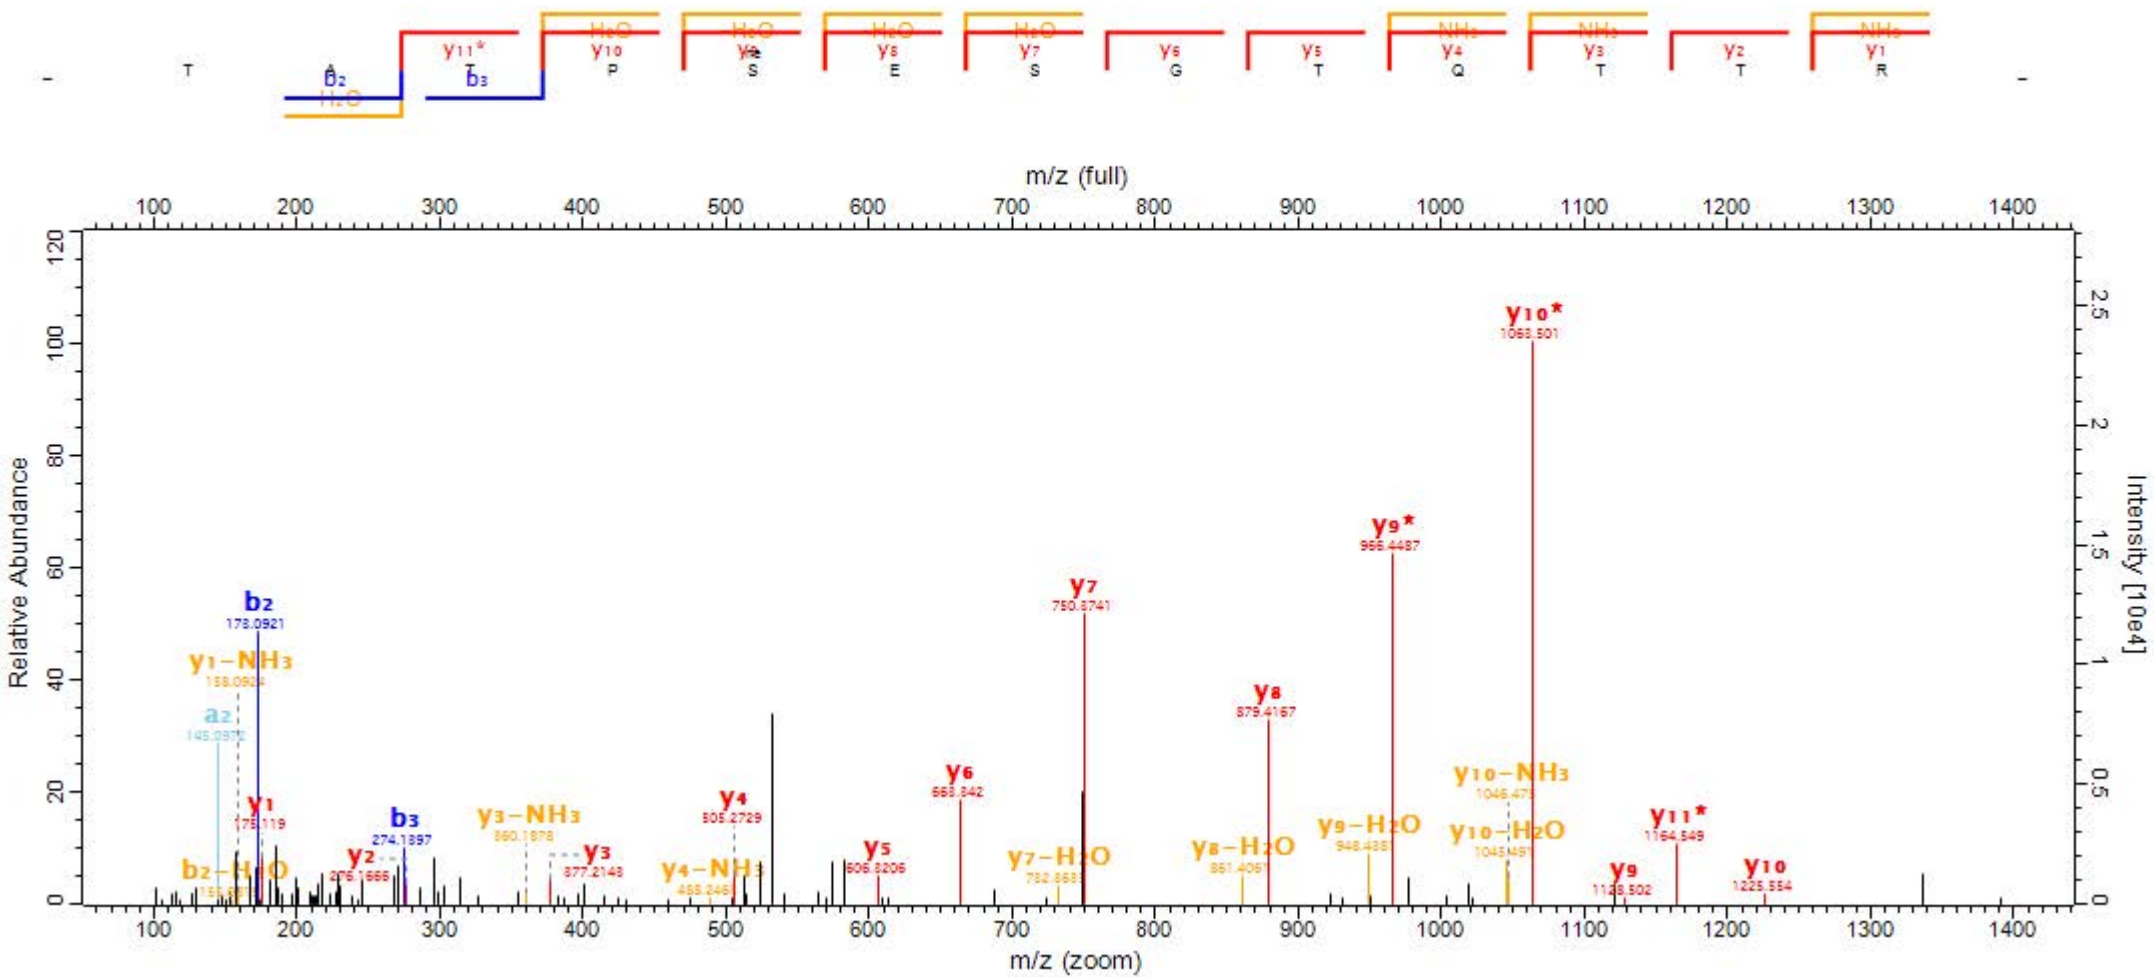

Scan number 1538 Raw file ges\_Mtb\_CFP\_200ng\_ETDinIT\_02dec12\_01\_121203095725  
Method ITMS; ETD Pepti... 140.31

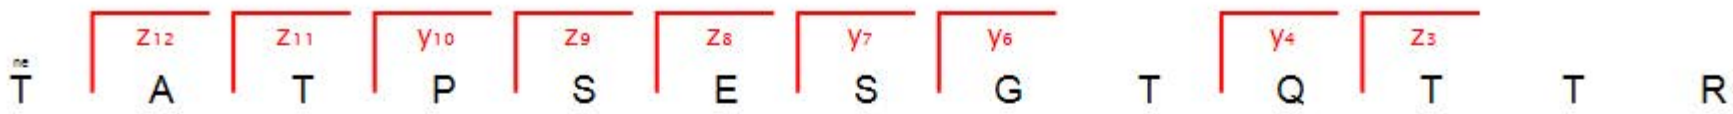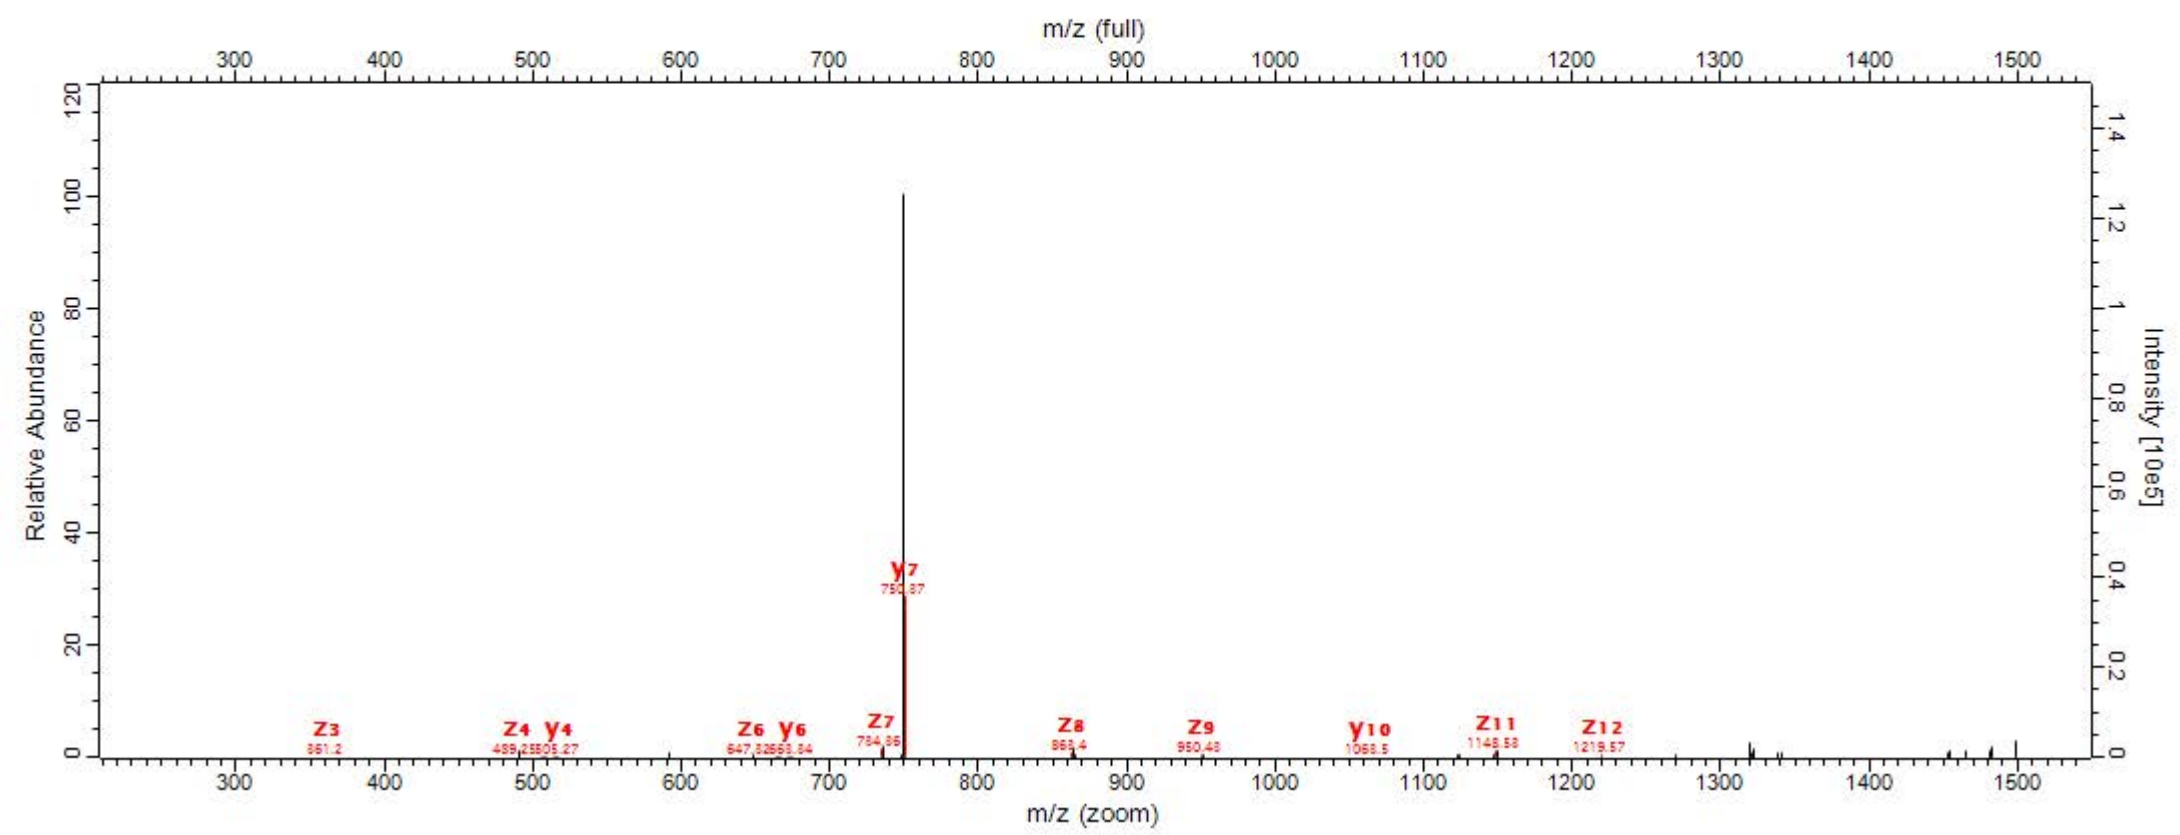

Scan number 1658 Raw file ges\_Mtb\_CFP\_20apr10\_03  
 Method ITMS: CID Pepti... 145.91

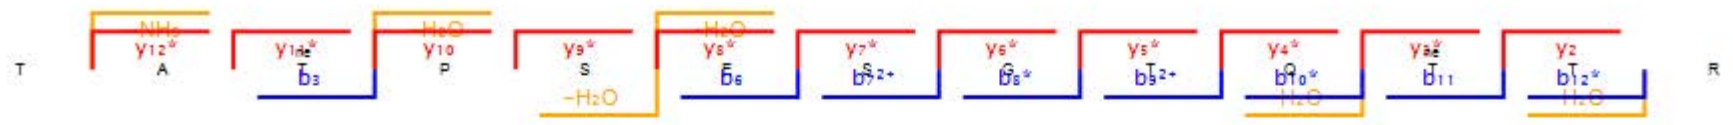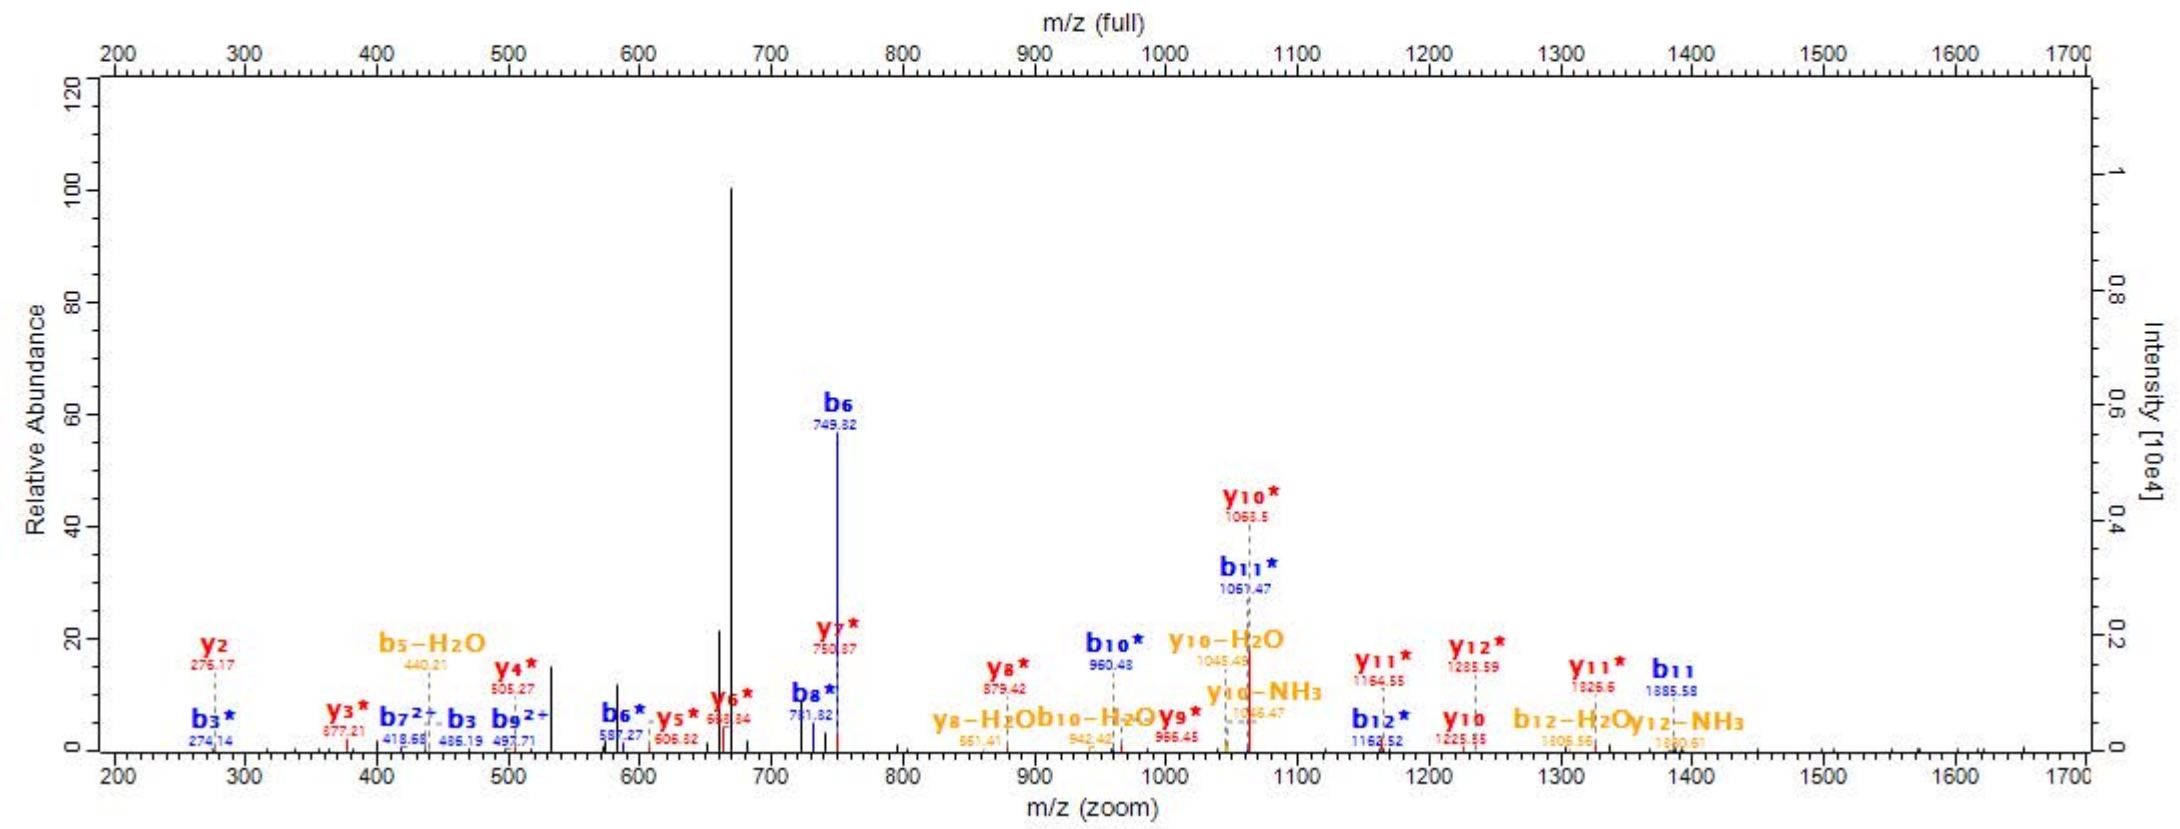

Scan number 1658 Raw file ges\_Mtb\_CFP\_20apr10\_03  
 Method ITMS: CID Pepti... 145.91



Scan number 17643 Raw file ges\_Mtb\_CFP\_20apr10\_02  
 Method ITMS: CID Pepti... 92.37

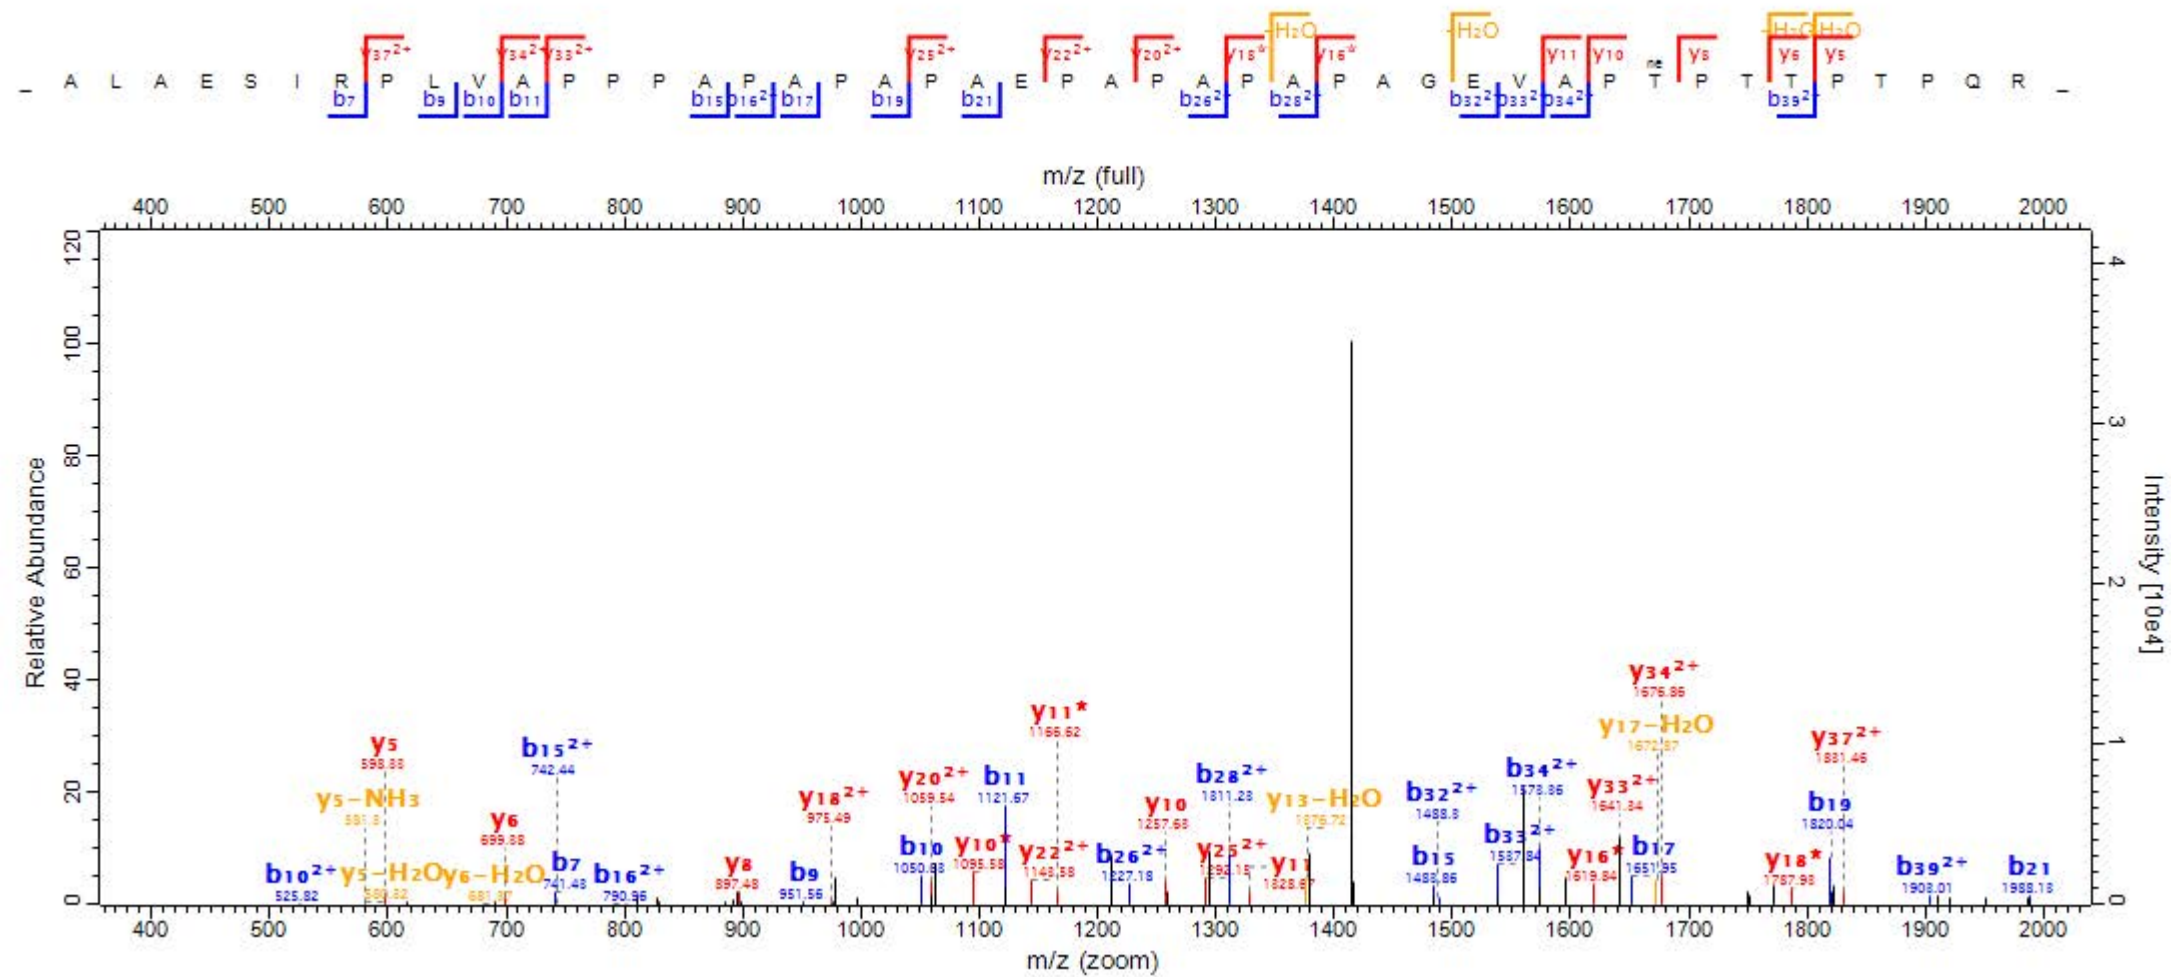

Supplement: NIHMS483027-supplement-01.pdf [file NIHMS483027-supplement-01.pdf]
